# Supplementary material for: New Series of Thiazole Derivatives: Synthesis, Structural Elucidation, Antimicrobial Activity, Molecular Modeling and MOE Docking
Source: PubMed Central journal article supplement (PMC6539608; doi:10.3390/molecules24091741), 2019-05-04

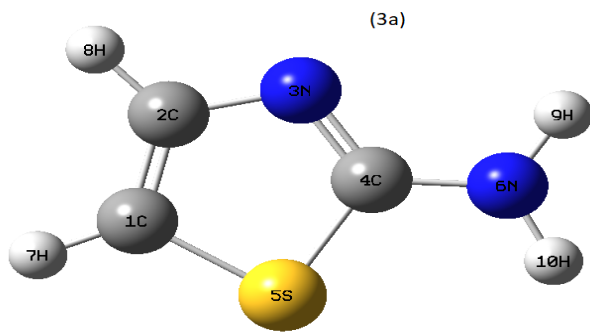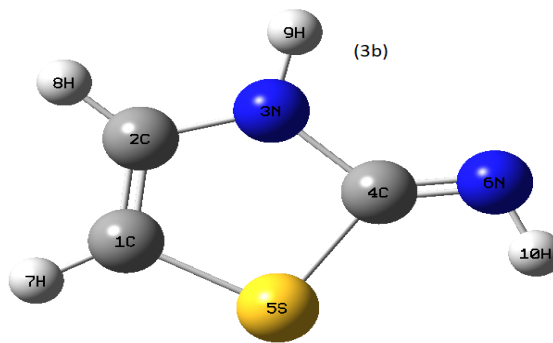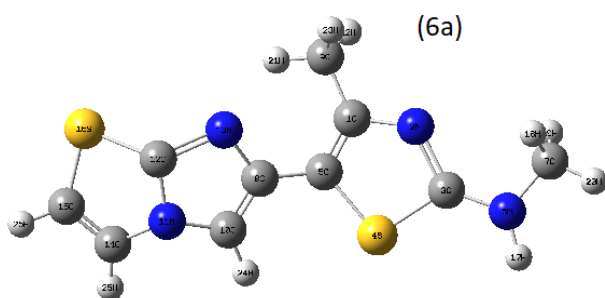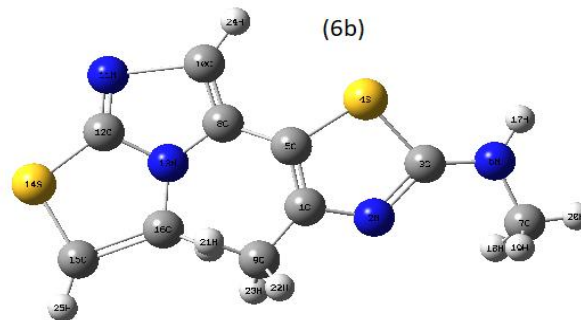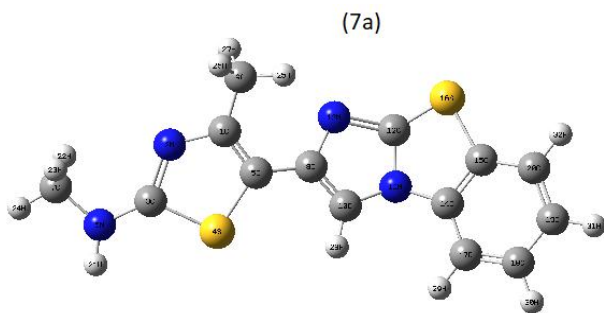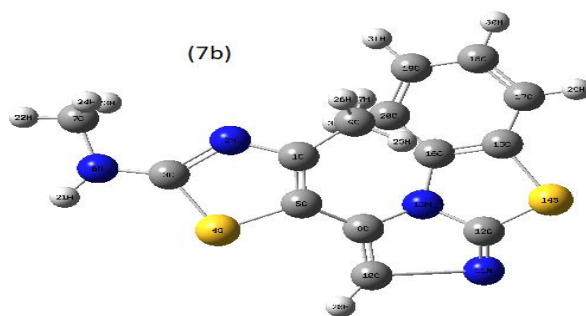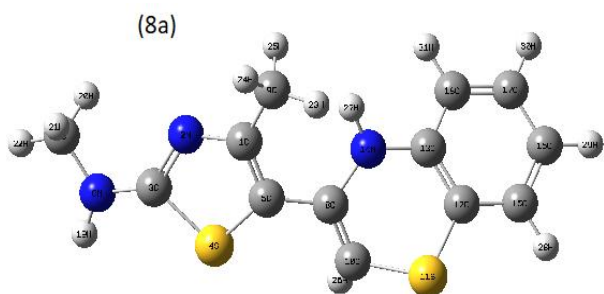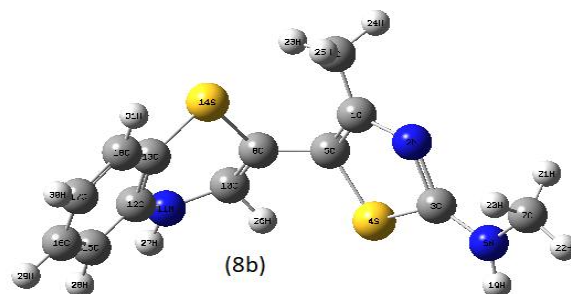

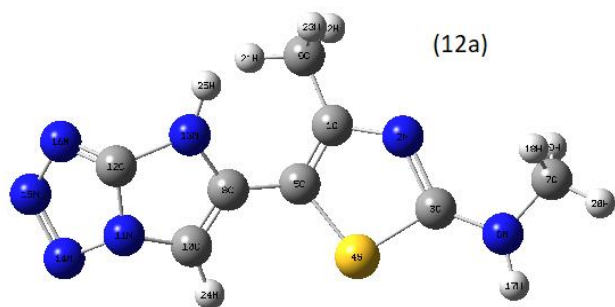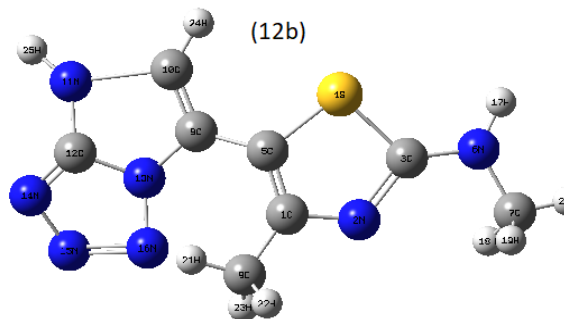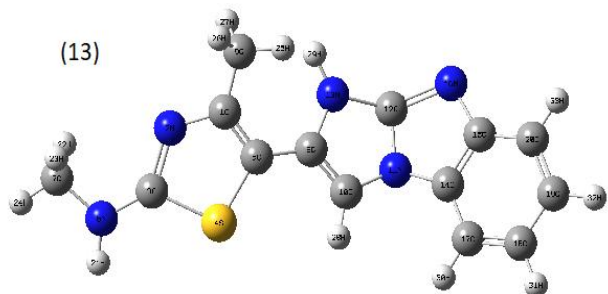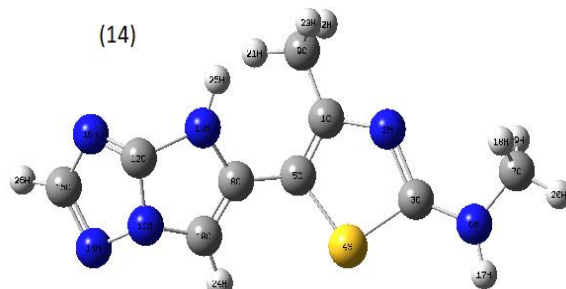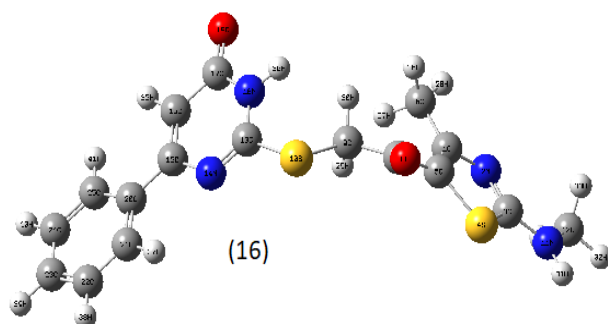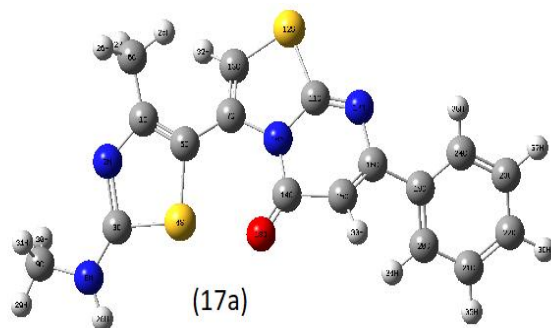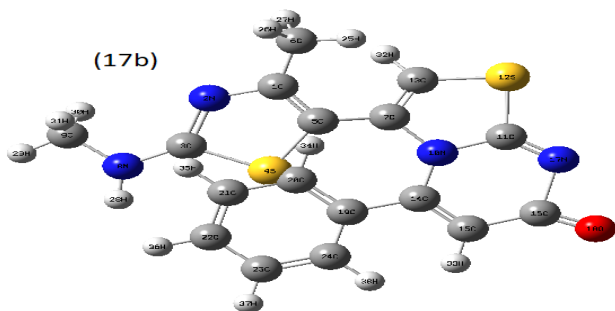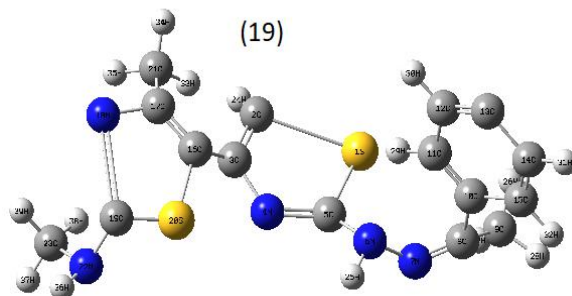

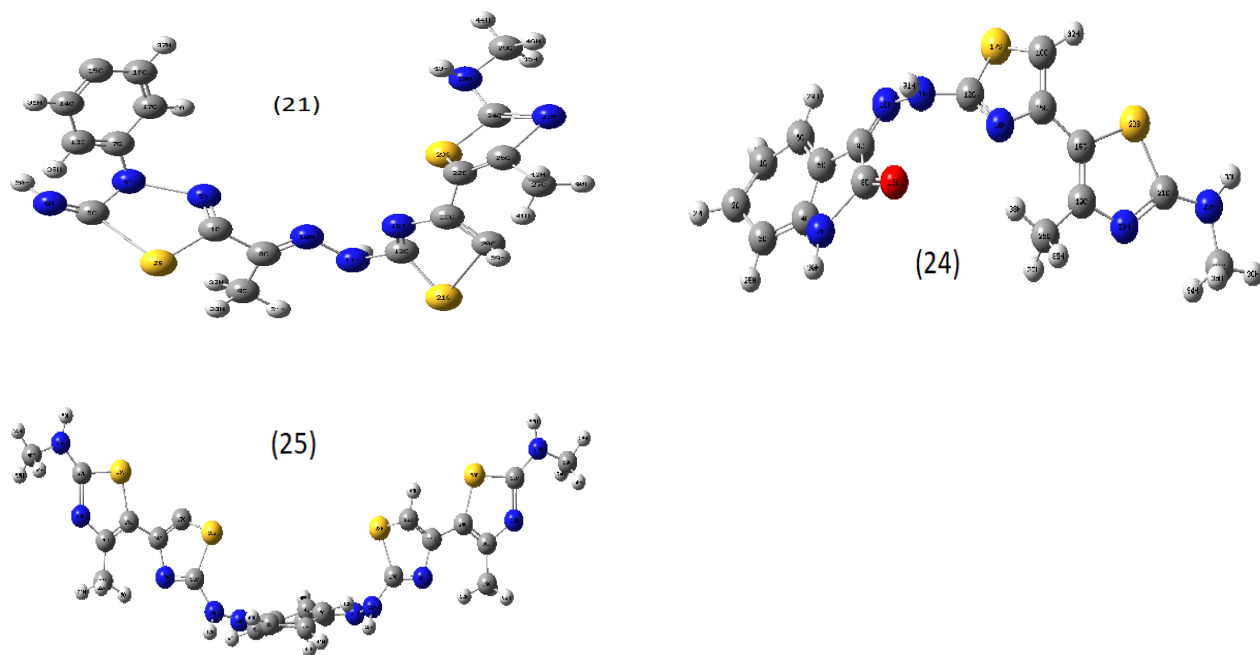

**Fig. 1S.** Optimized structures for synthesized compounds

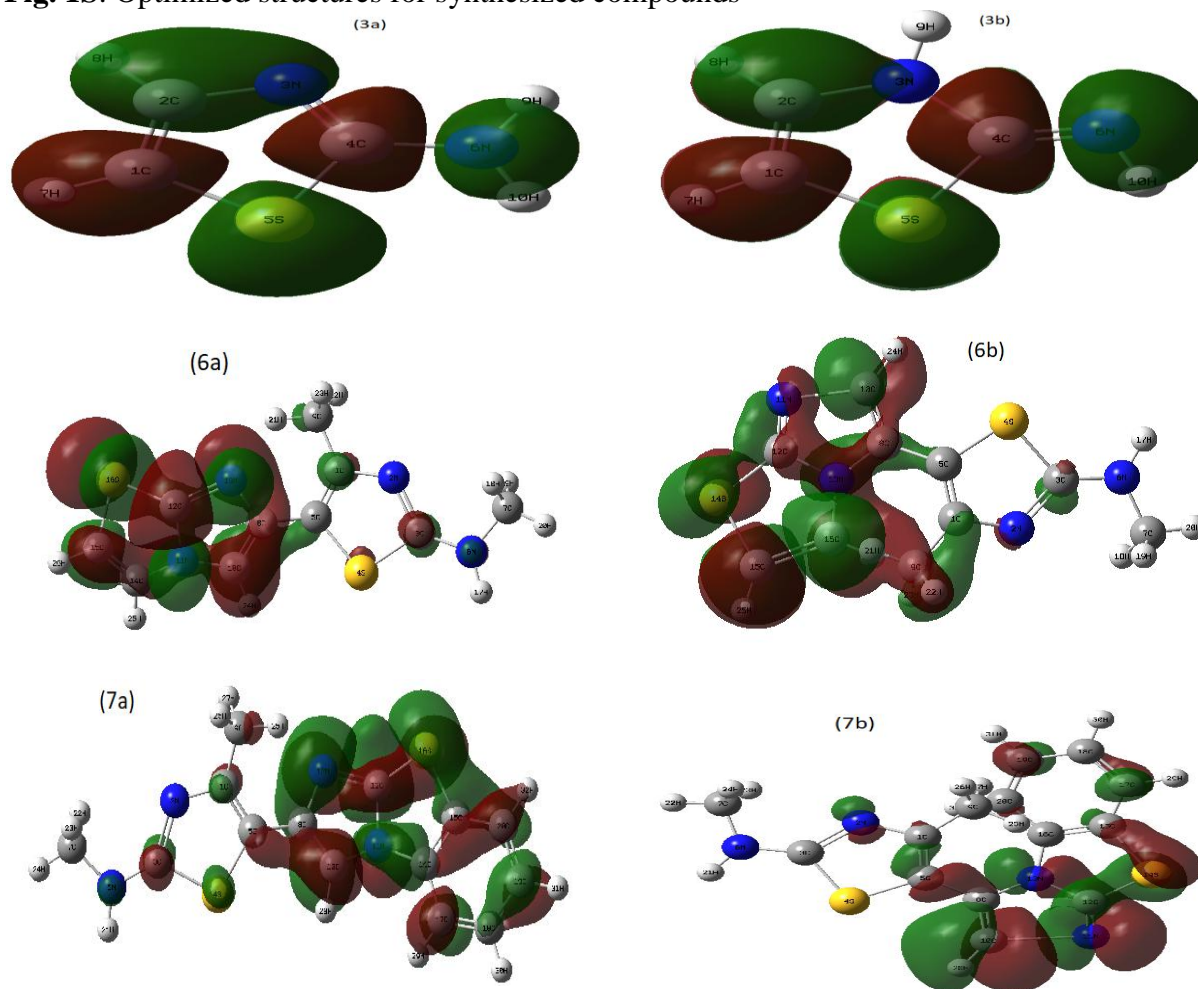



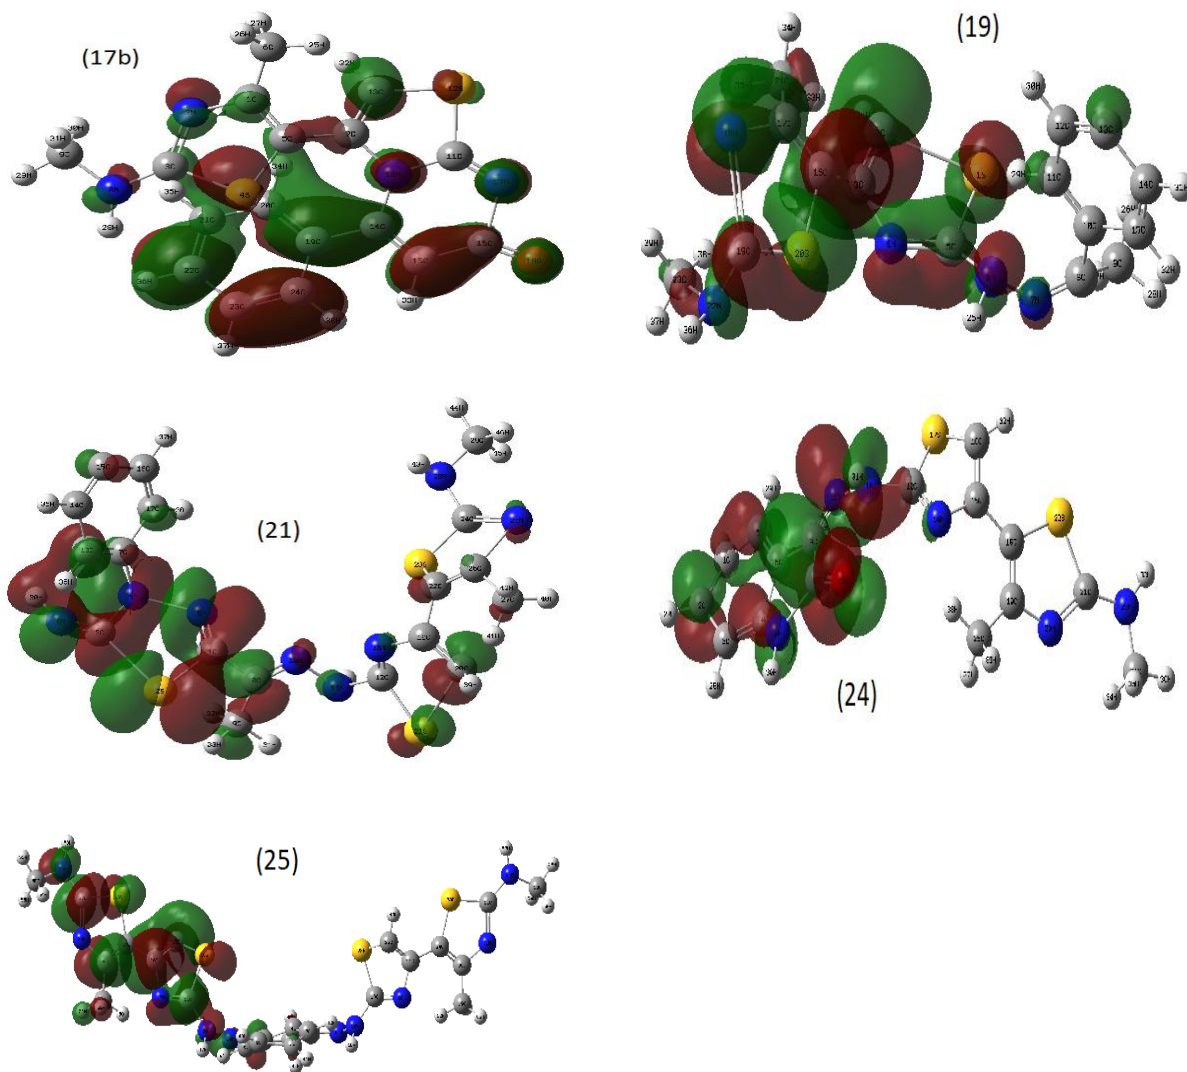

**Fig. 2S.** LUMO images of optimized structures



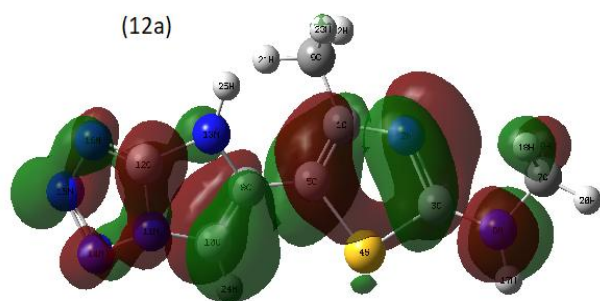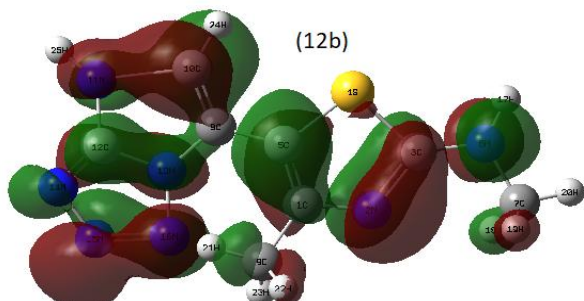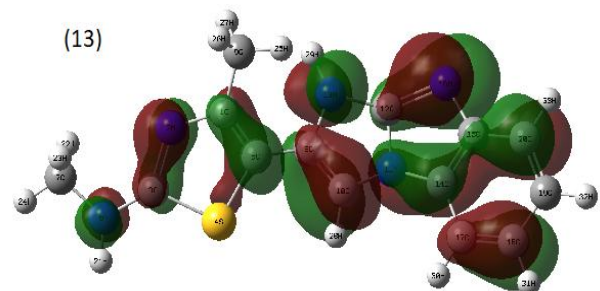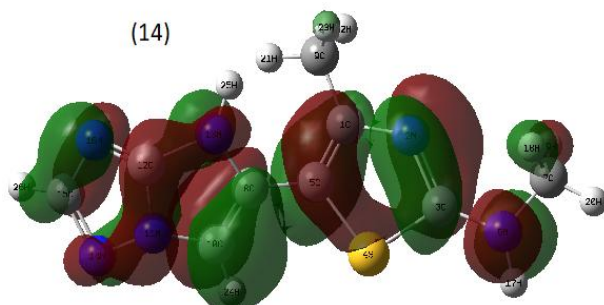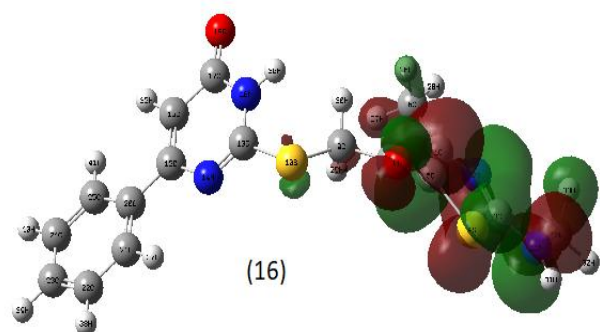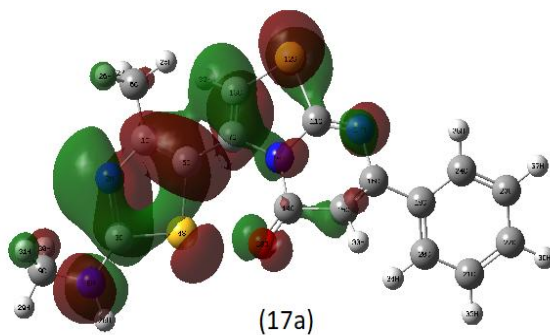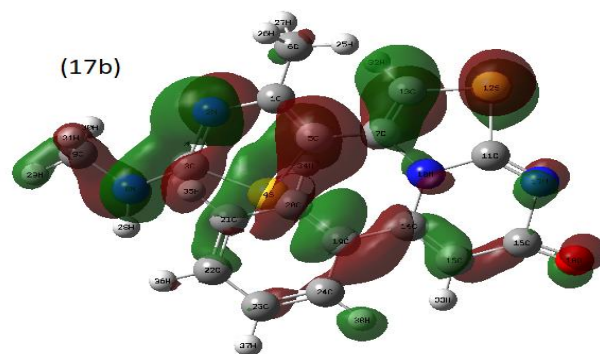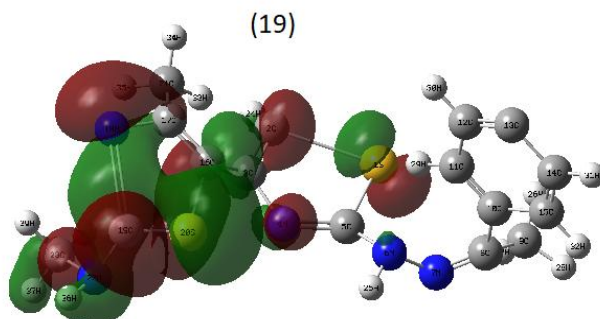

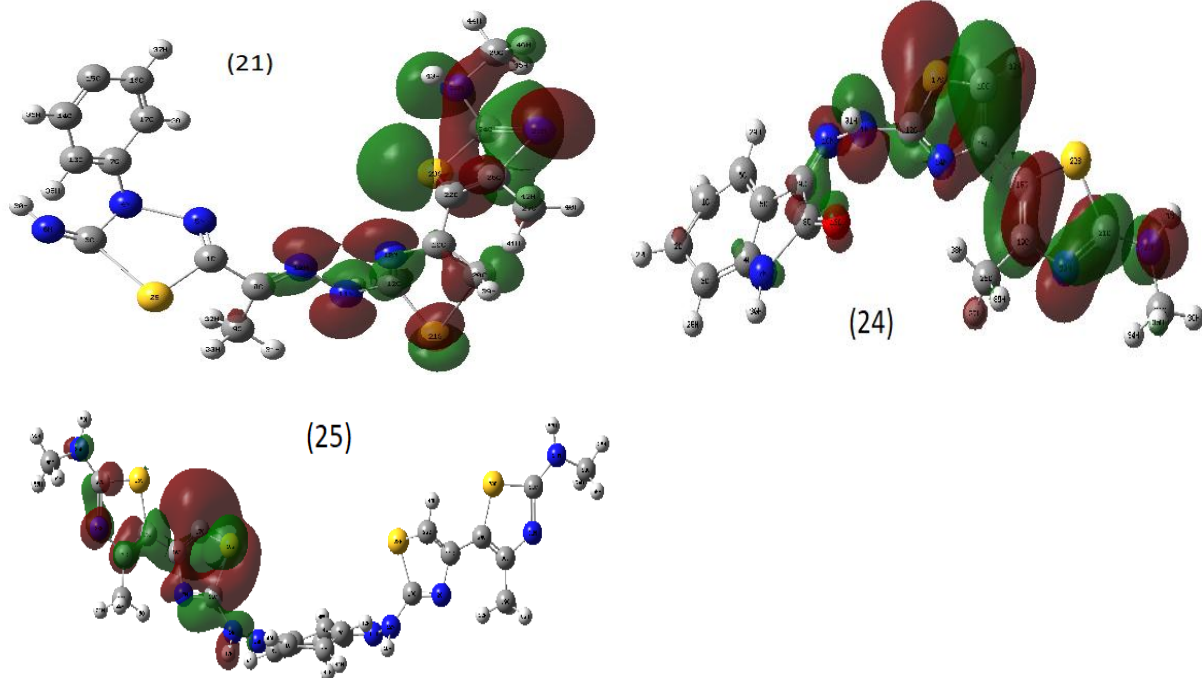

**Figure 3S** HOMO images of optimized structures



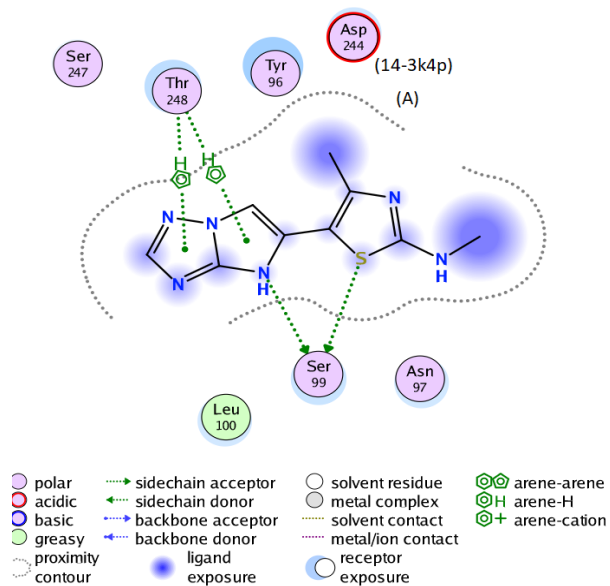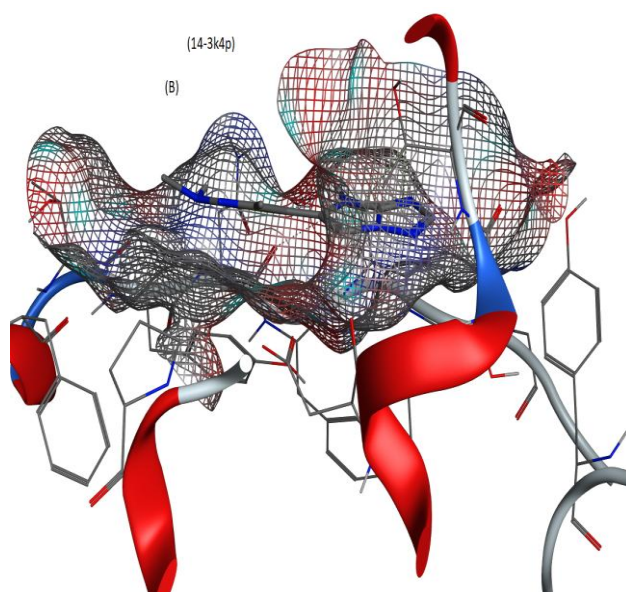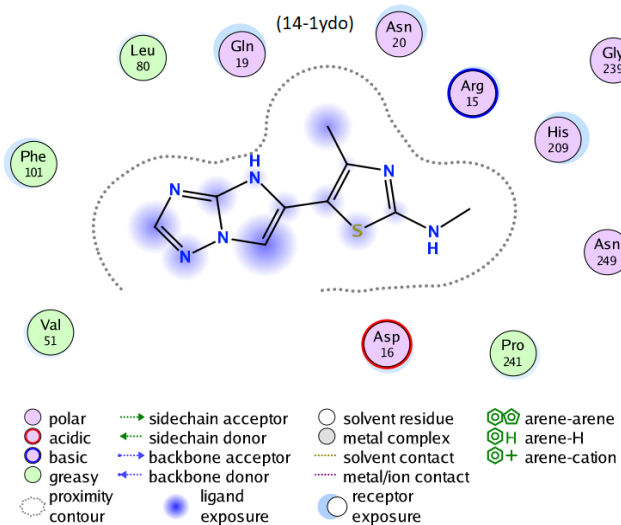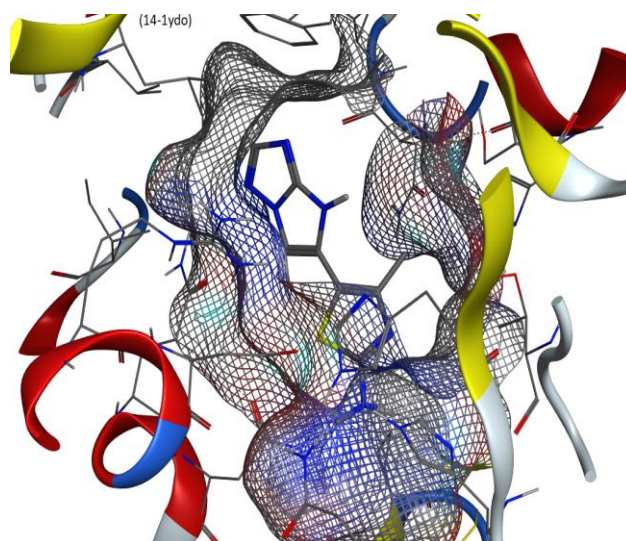

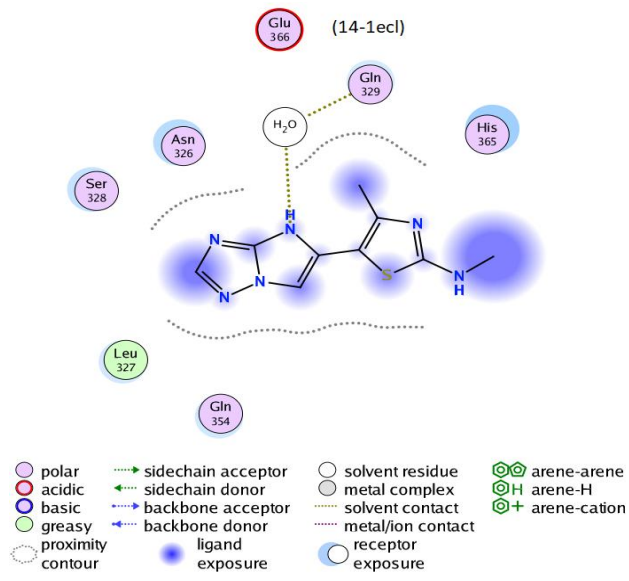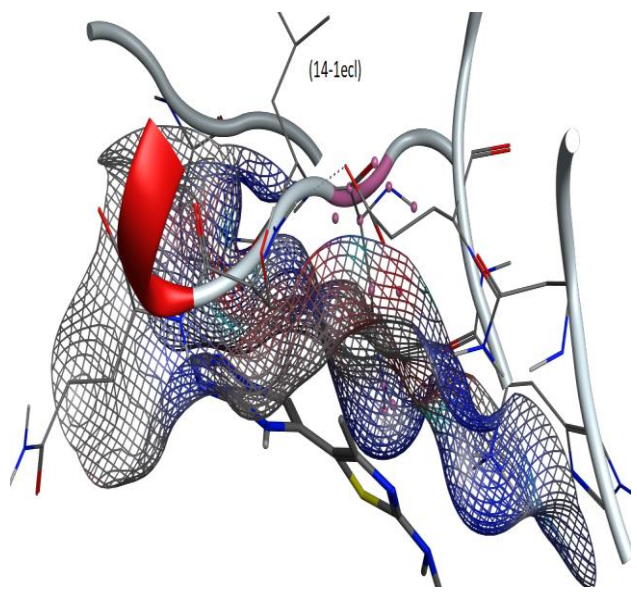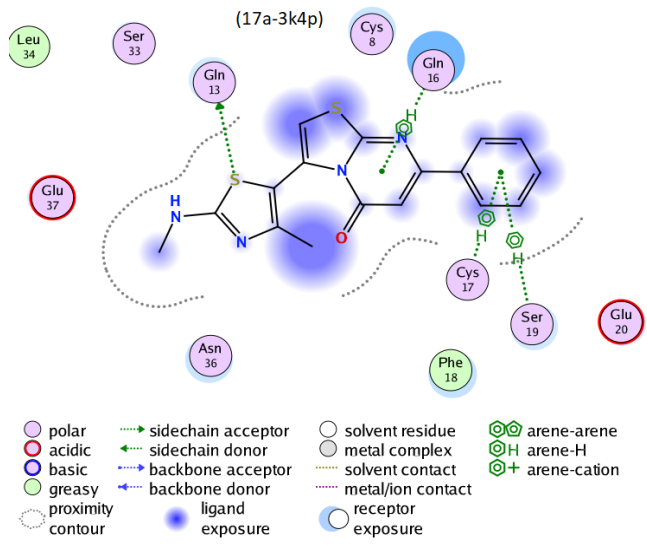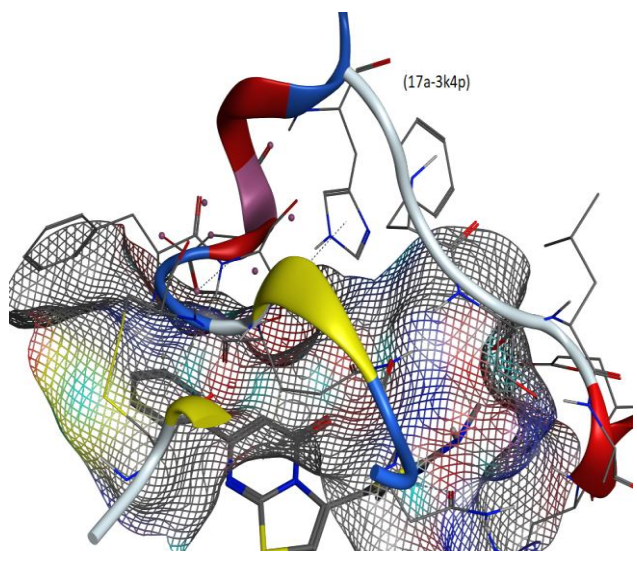

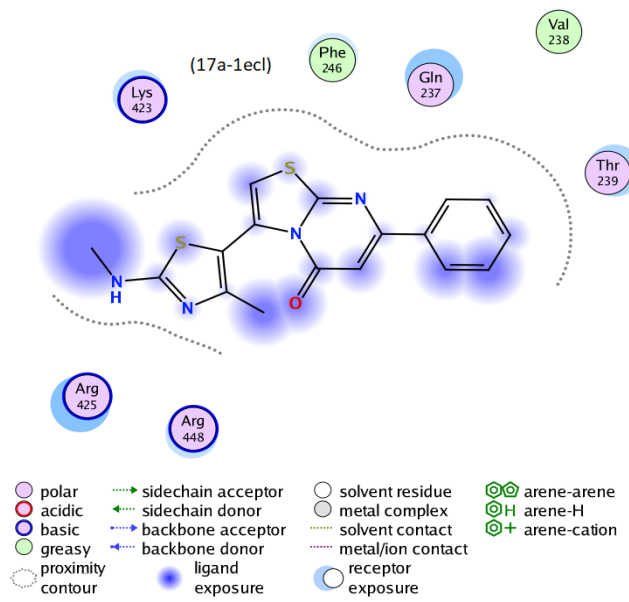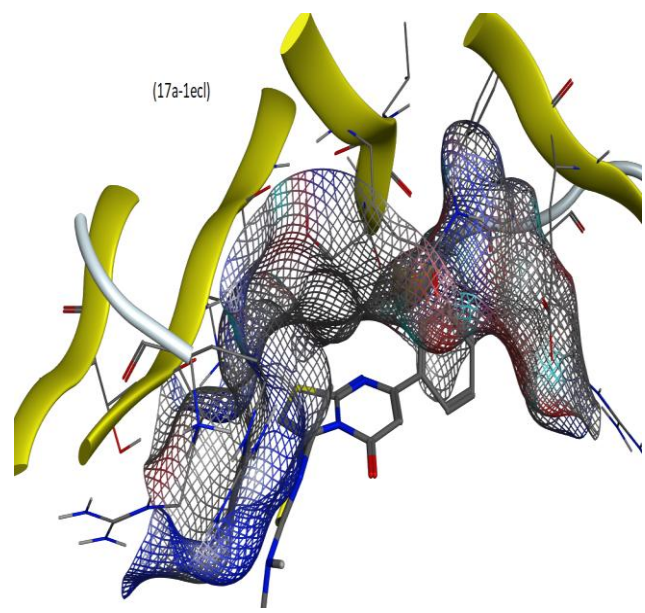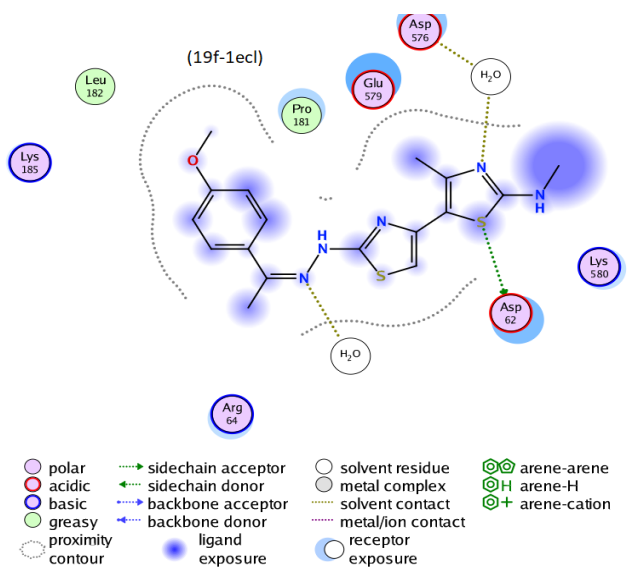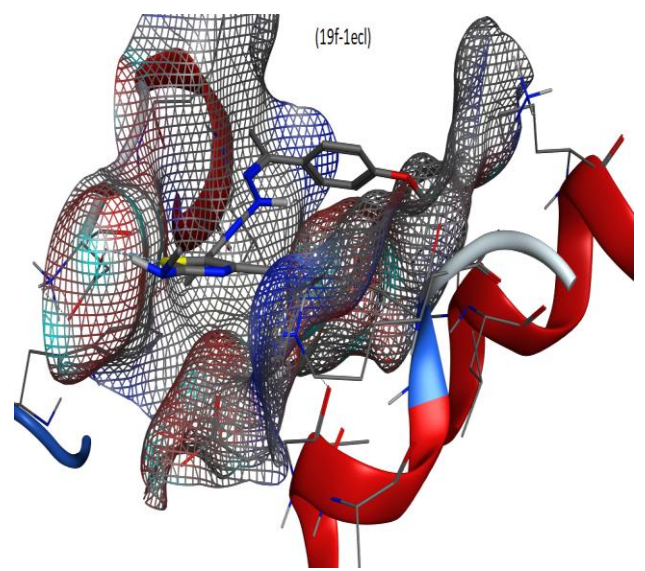

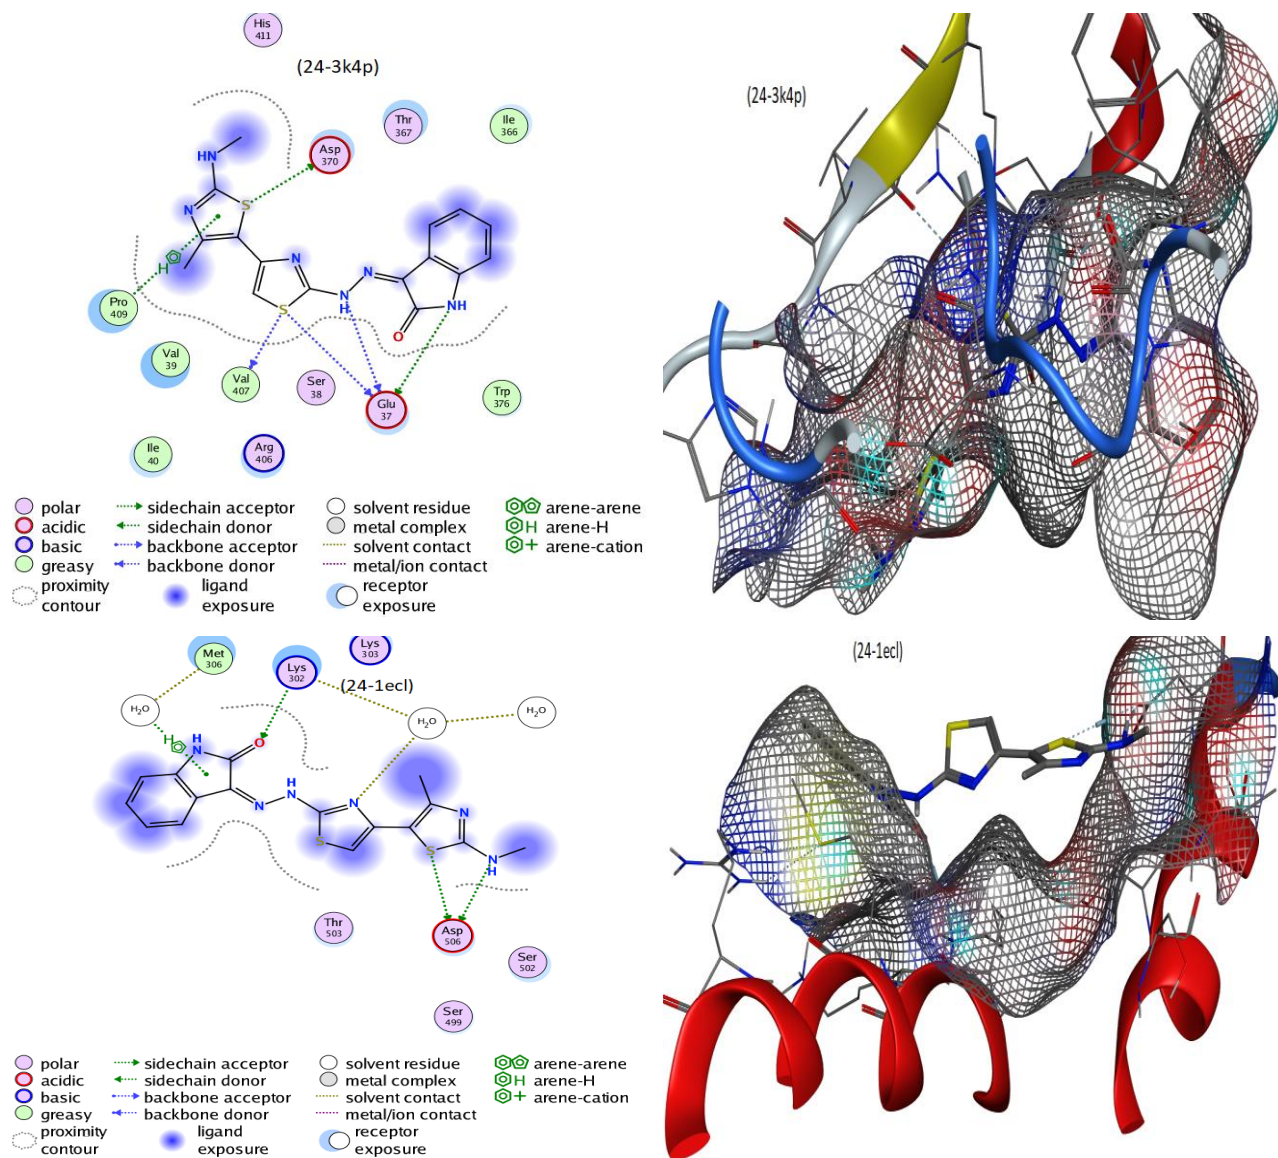

**Fig. 4S.** Remaining docking interactions (A) and surfaces maps (B) against, 3k4p, 1ydo & 1ecl

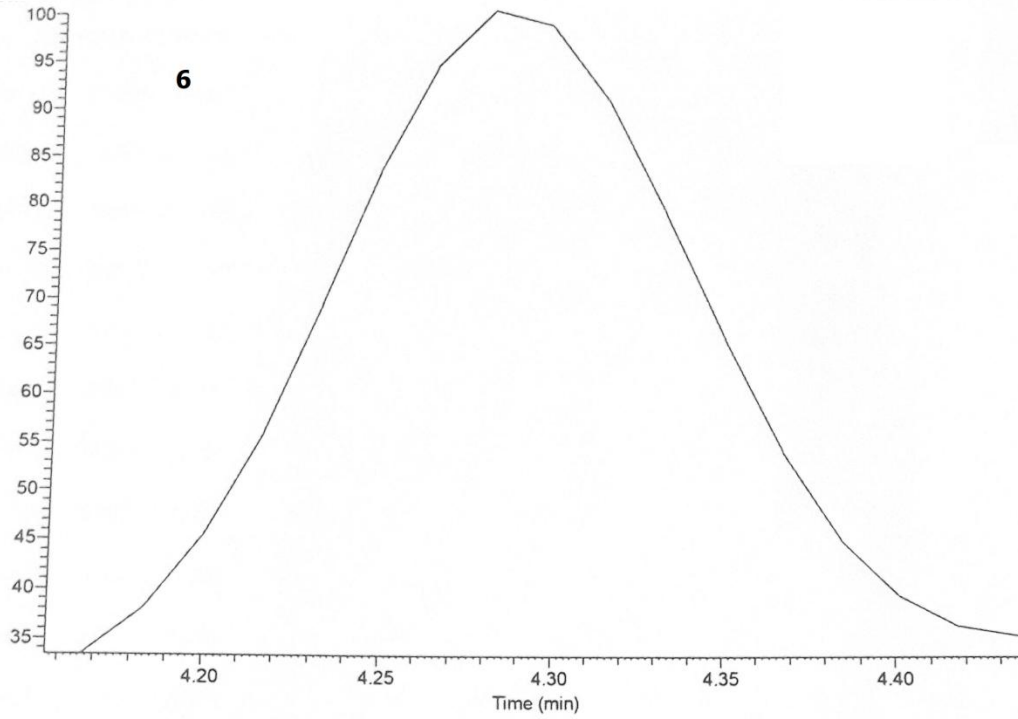

5H3 #171 RT: 2.88 AV: 1 NL: 3.79E2  
 T: (0.0) + c EI Full ms [40.00-1000.00]

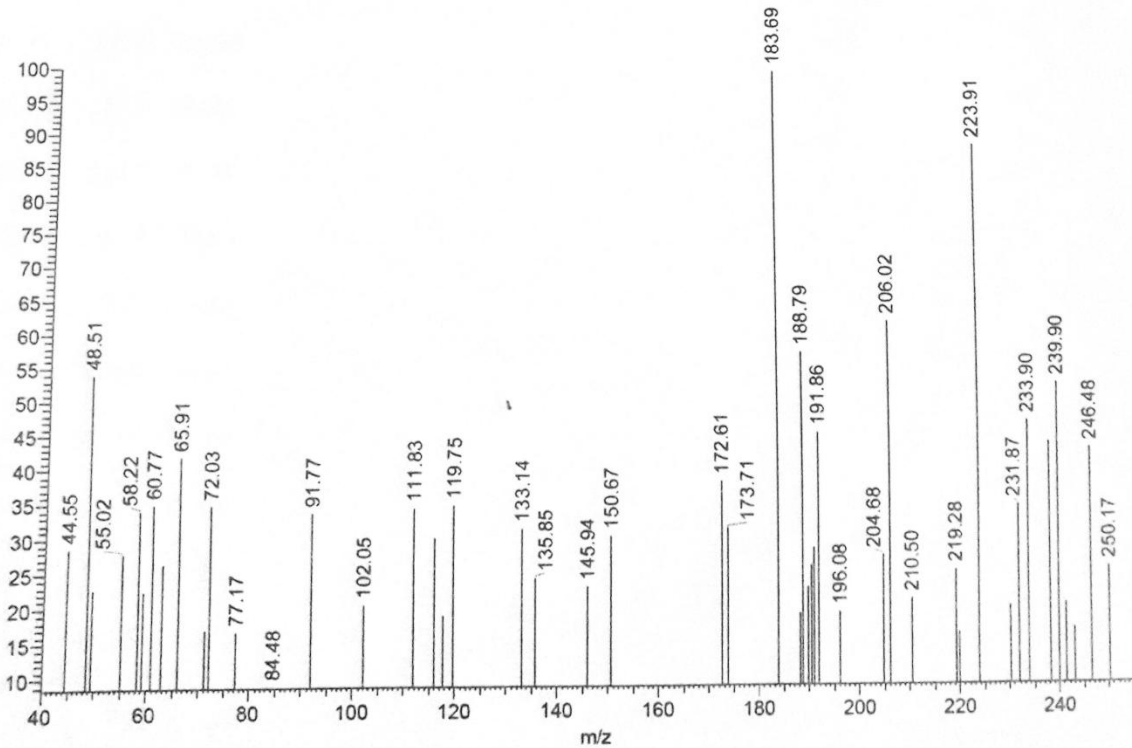

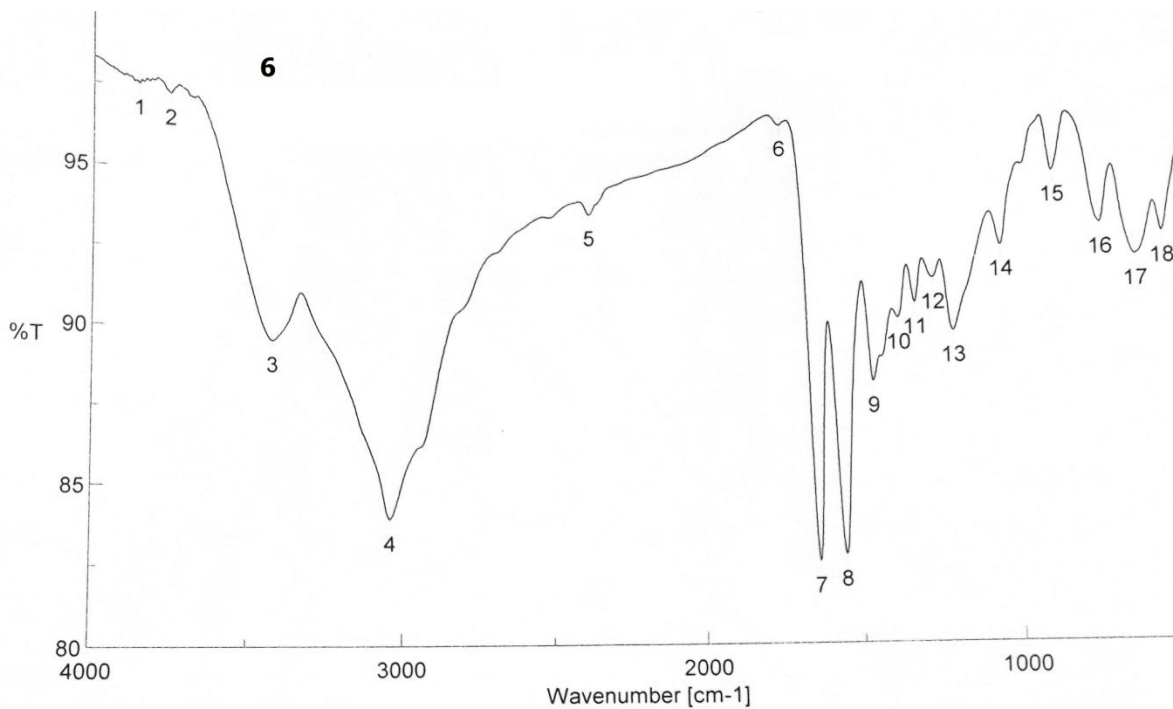

[Comments]

Sample name SH 3  
 Comment 6/2018  
 User IR  
 Division IR  
 Company MAC

[ Result of Peak Picking ]

| No. | Position | Intensity | No. | Position | Intensity | No. | Position | Intensity |
|-----|----------|-----------|-----|----------|-----------|-----|----------|-----------|
| 1   | 3855.01  | 97.5896   | 2   | 3752.8   | 97.3519   | 3   | 3417.24  | 89.564    |
| 4   | 3038.3   | 83.9486   | 5   | 2372.98  | 93.5806   | 6   | 1738.51  | 96.2254   |
| 7   | 1634.38  | 82.5251   | 8   | 1551.45  | 82.7093   | 9   | 1454.06  | 88.0556   |
| 10  | 1371.14  | 89.9974   | 11  | 1316.18  | 90.4638   | 12  | 1257.36  | 91.2128   |
| 13  | 1196.61  | 89.552    | 14  | 1036.55  | 92.1737   | 15  | 864.917  | 94.4247   |
| 16  | 717.39   | 92.7528   | 17  | 608.431  | 91.7391   | 18  | 523.579  | 92.4123   |
| 19  | 423.298  | 95.1315   |     |          |           |     |          |           |

6

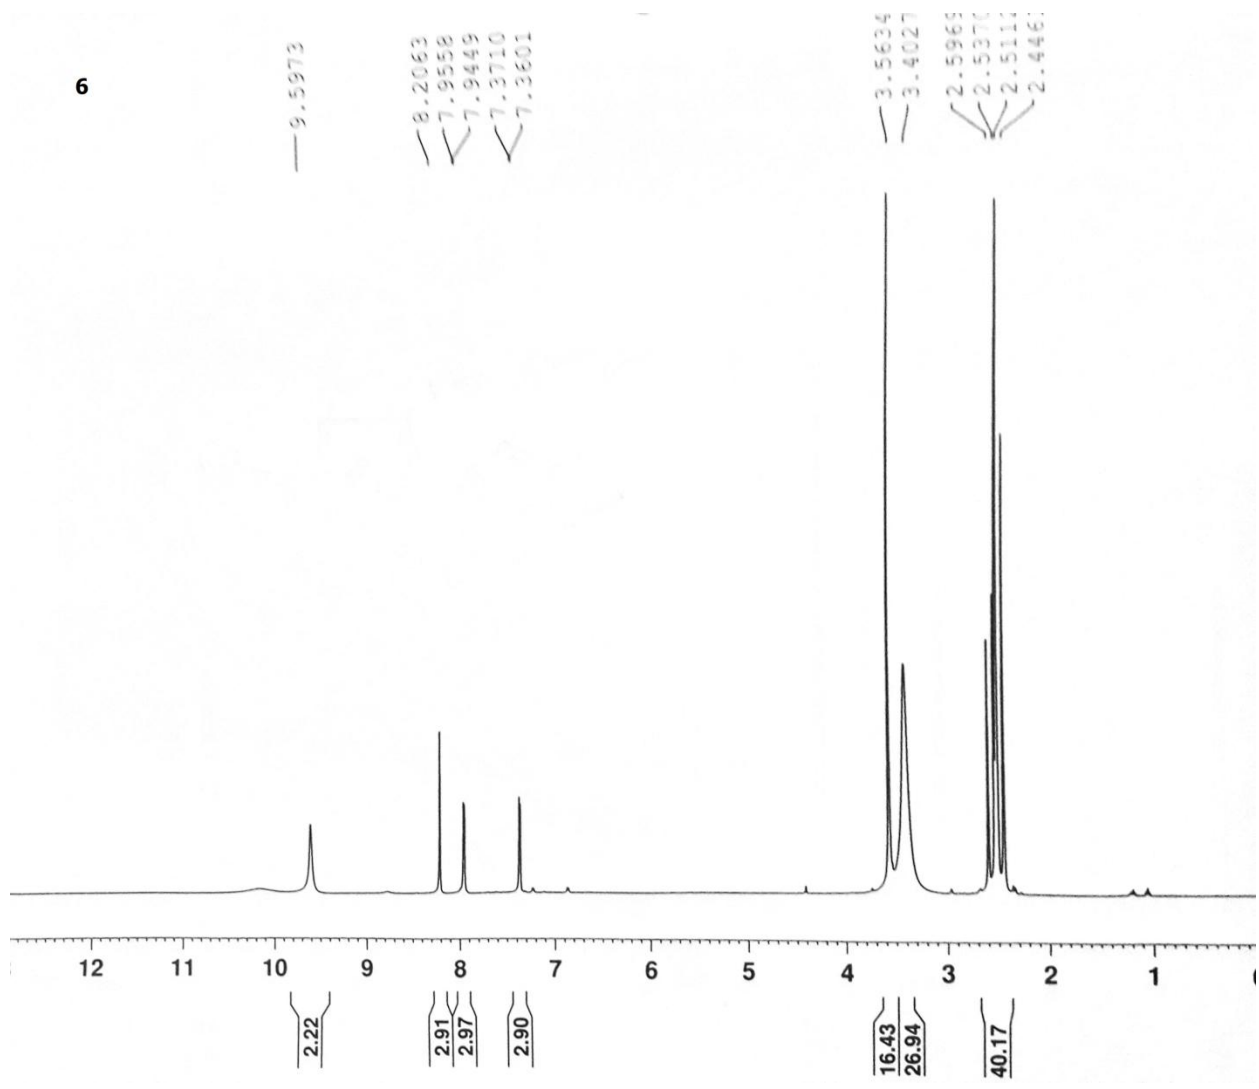

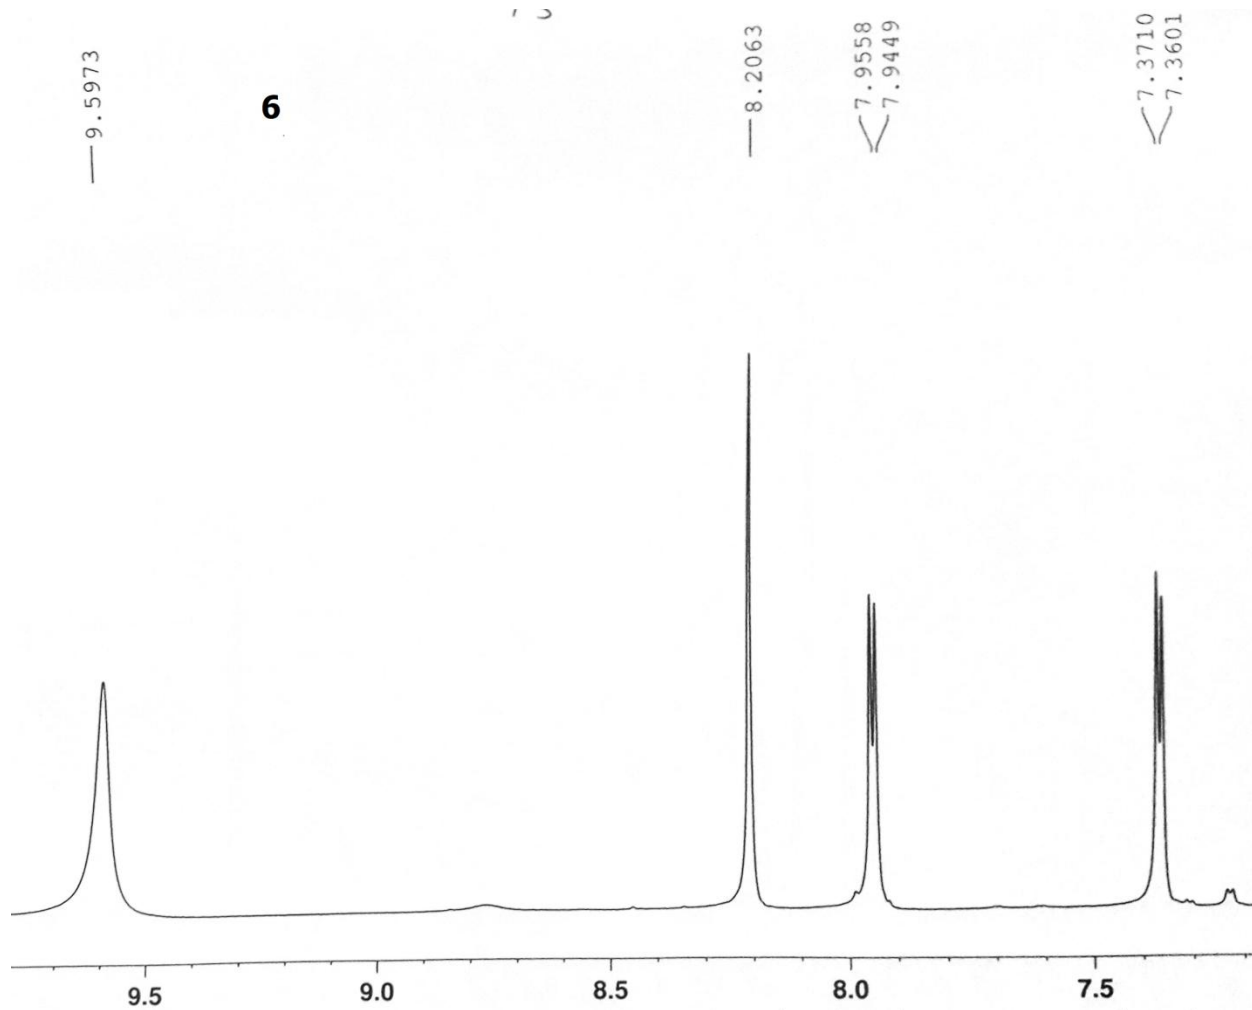



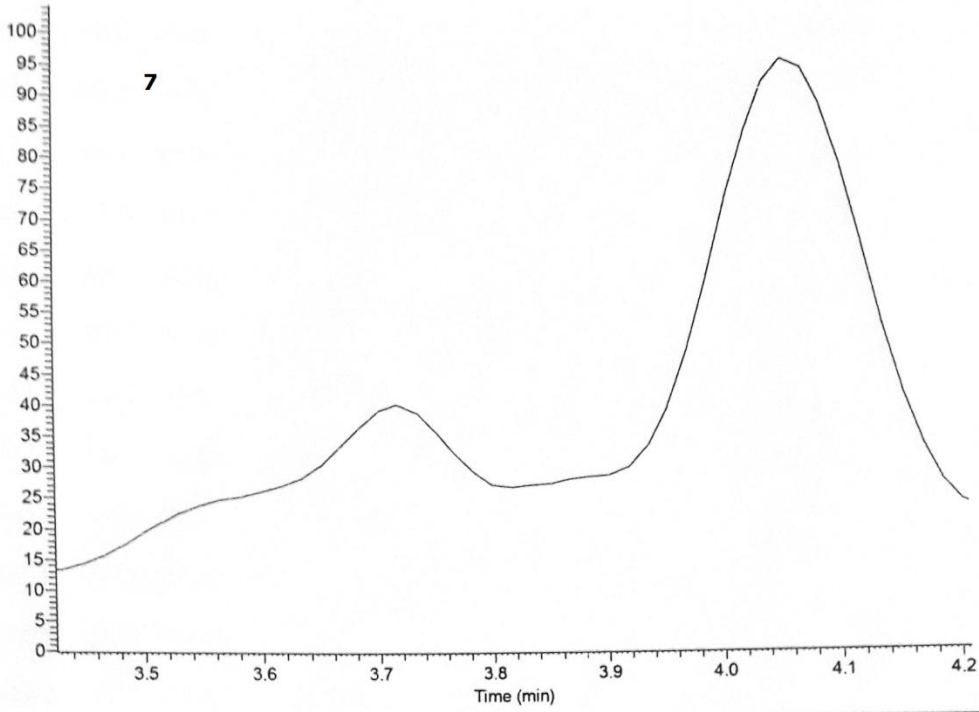

5h4 #157 RT: 2.64 AV: 1 NL: 4.04E2  
 T: (0.0) + c EI Full ms [40.00-1000.00]

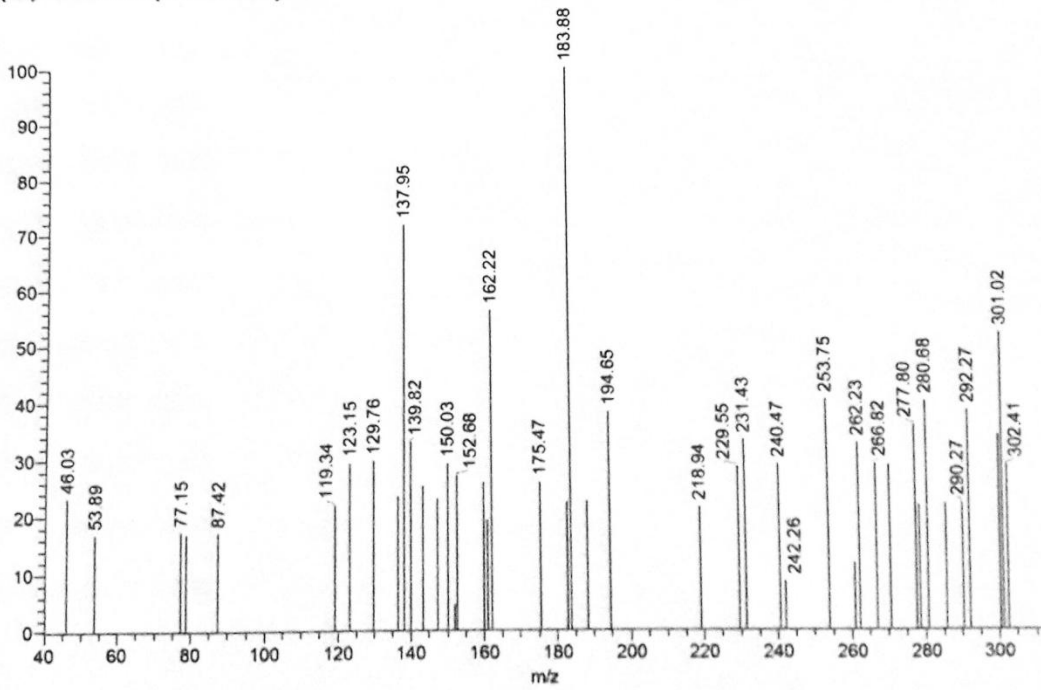

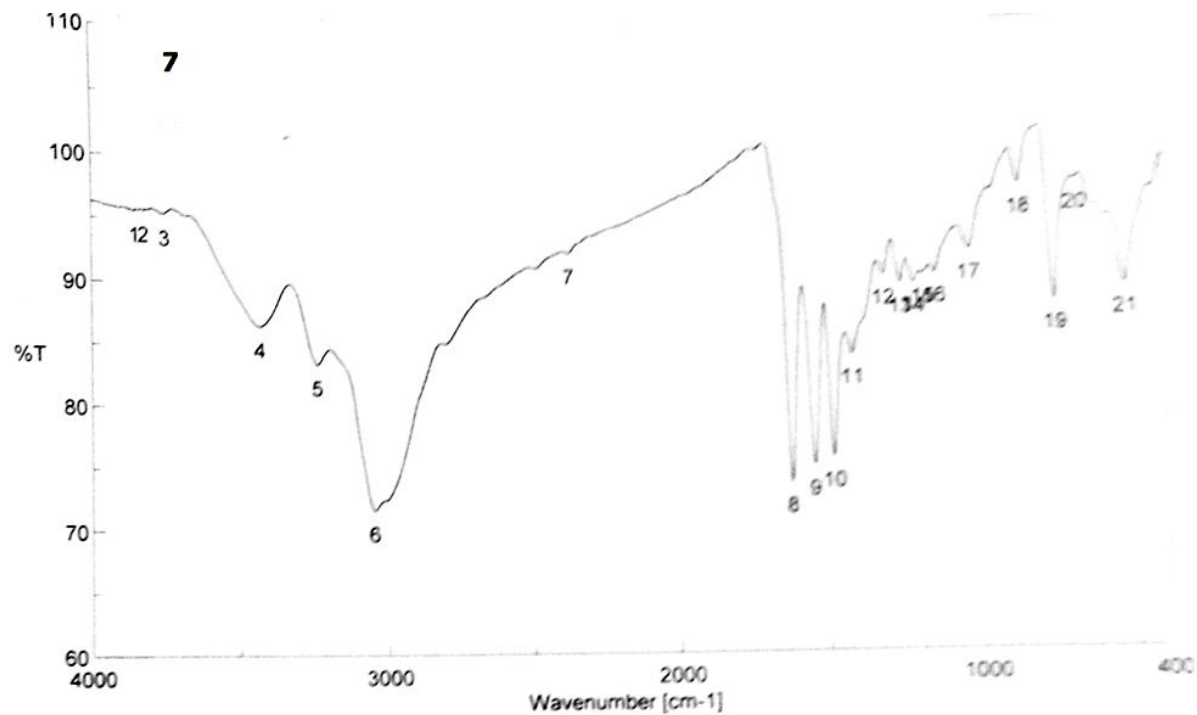

[Comments]  
 Sample name SH 4  
 Comment 6/2018  
 User IR  
 Division IR  
 Company MAC

[ Result of Peak Picking ]

| No. | Position | Intensity | No. | Position | Intensity | No. | Position | Intensity |
|-----|----------|-----------|-----|----------|-----------|-----|----------|-----------|
| 1   | 3855.01  | 95.5399   | 2   | 3823.19  | 95.5808   | 3   | 3753.76  | 95.2994   |
| 4   | 3432.67  | 86.4814   | 5   | 3238.86  | 83.4322   | 6   | 3047.94  | 71.651    |
| 7   | 2377.8   | 92.2107   | 8   | 1623.77  | 73.4401   | 9   | 1549.52  | 74.7523   |
| 10  | 1486.85  | 75.3384   | 11  | 1424.17  | 83.4751   | 12  | 1318.11  | 89.7044   |
| 13  | 1262.18  | 89.0024   | 14  | 1219.76  | 88.9877   | 15  | 1188.9   | 89.6694   |
| 16  | 1149.37  | 89.7399   | 17  | 1034.62  | 91.5184   | 18  | 864.917  | 96.6301   |
| 19  | 752.102  | 87.3453   | 20  | 679.785  | 96.8004   | 21  | 522.615  | 88.4527   |

7

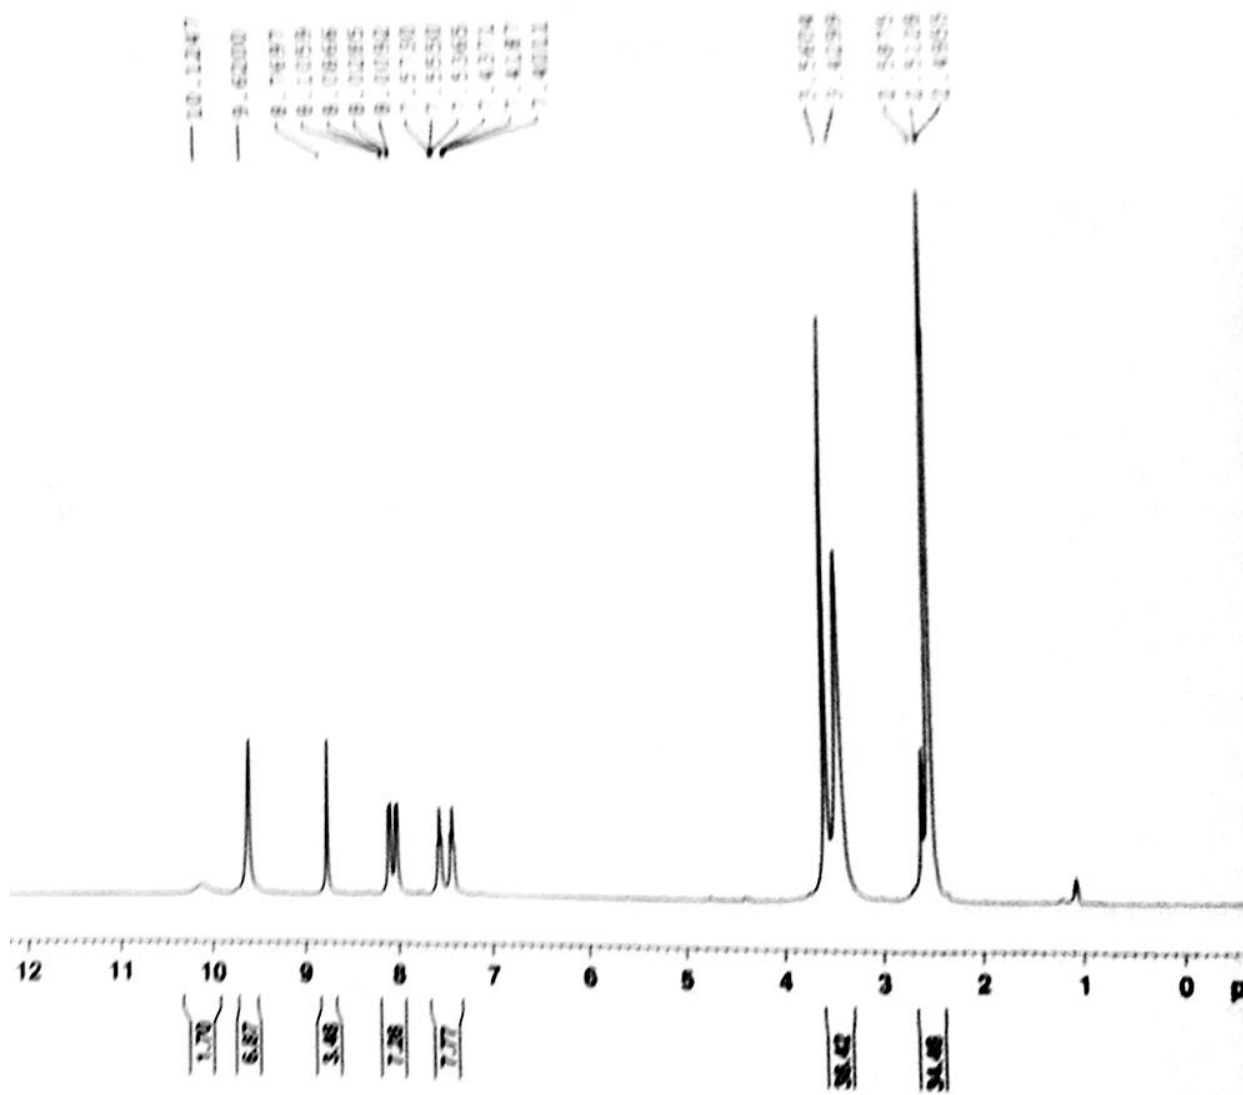

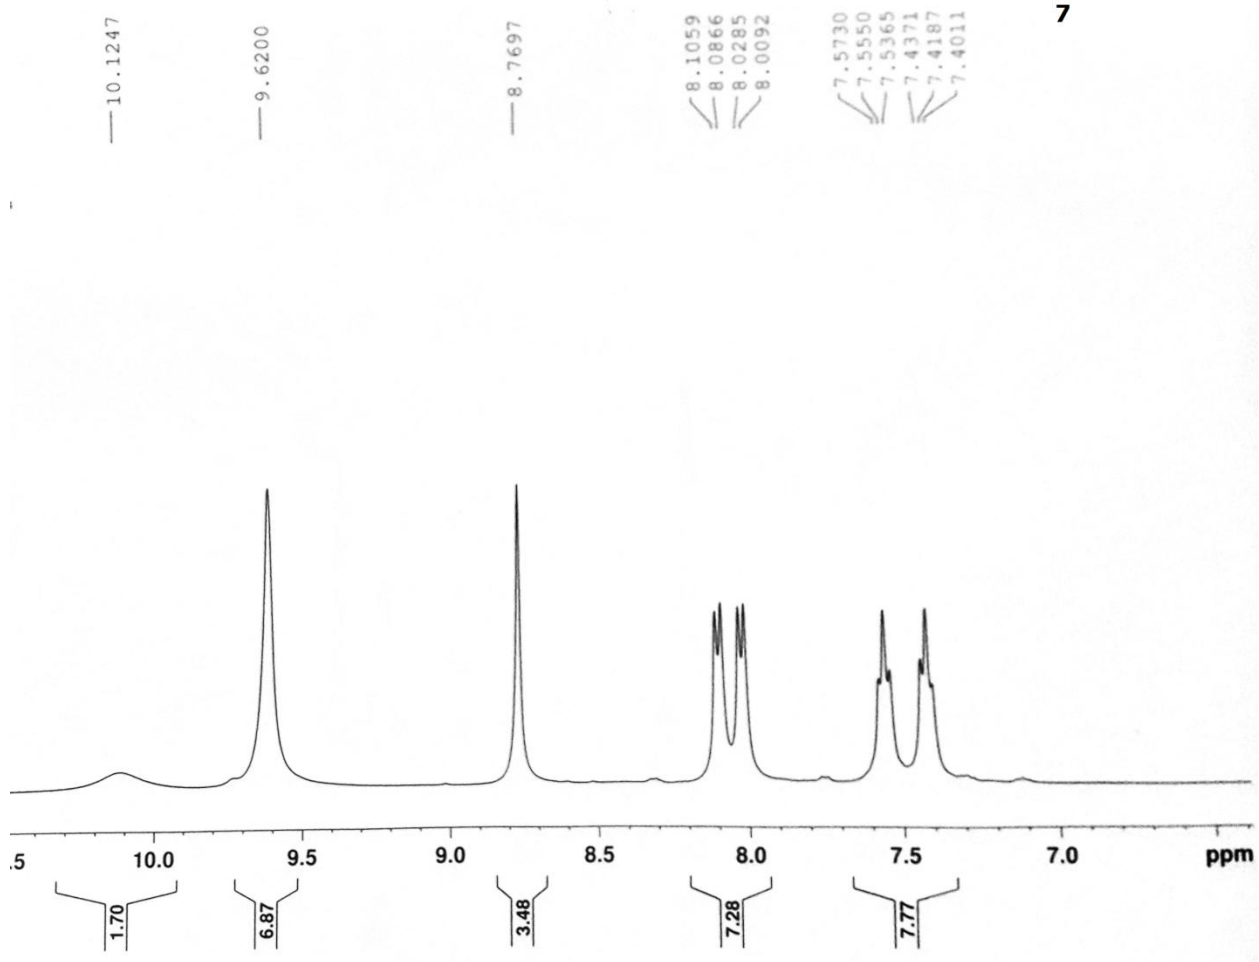

7

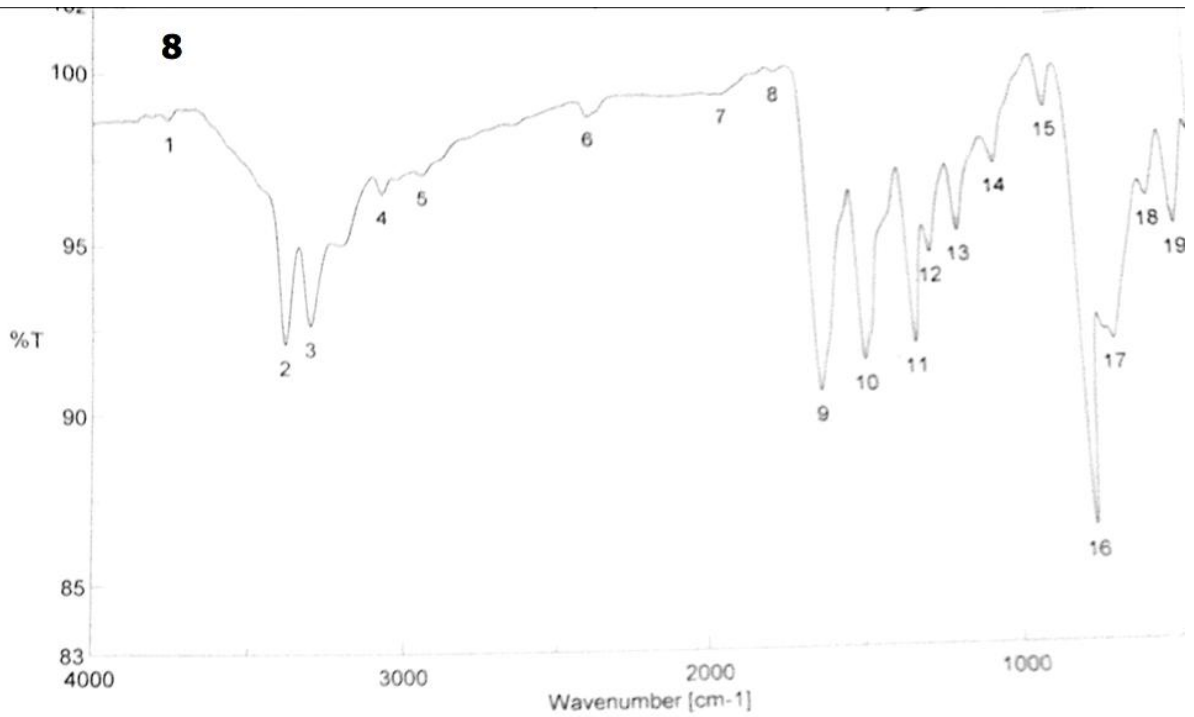

[Comments]

Sample name SH20  
 Comment 9/2018  
 User IR  
 Division IR  
 Company MAC

[ Result of Peak Picking ]

| No | Position | Intensity | No | Position | Intensity | No | Position | Intensity |
|----|----------|-----------|----|----------|-----------|----|----------|-----------|
| 1  | 3755.69  | 98.9028   | 2  | 3374.82  | 92.2544   | 3  | 3293.82  | 92.832    |
| 4  | 3059.51  | 96.9929   | 5  | 2926.45  | 97.6254   | 6  | 2365.26  | 99.5368   |
| 7  | 1912.07  | 100.128   | 8  | 1735.62  | 100.759   | 9  | 1612.2   | 90.618    |
| 10 | 1466.6   | 91.5195   | 11 | 1300.75  | 92.0103   | 12 | 1243.86  | 94.7822   |
| 13 | 1151.29  | 95.4065   | 14 | 1024.98  | 97.4375   | 15 | 853.347  | 99.0744   |
| 16 | 749.209  | 86.3346   | 17 | 665.321  | 91.8759   | 18 | 540.935  | 96.1316   |
| 19 | 458.011  | 95.2293   |    |          |           |    |          |           |

*Handwritten signature*  
 P. Ananthan

12

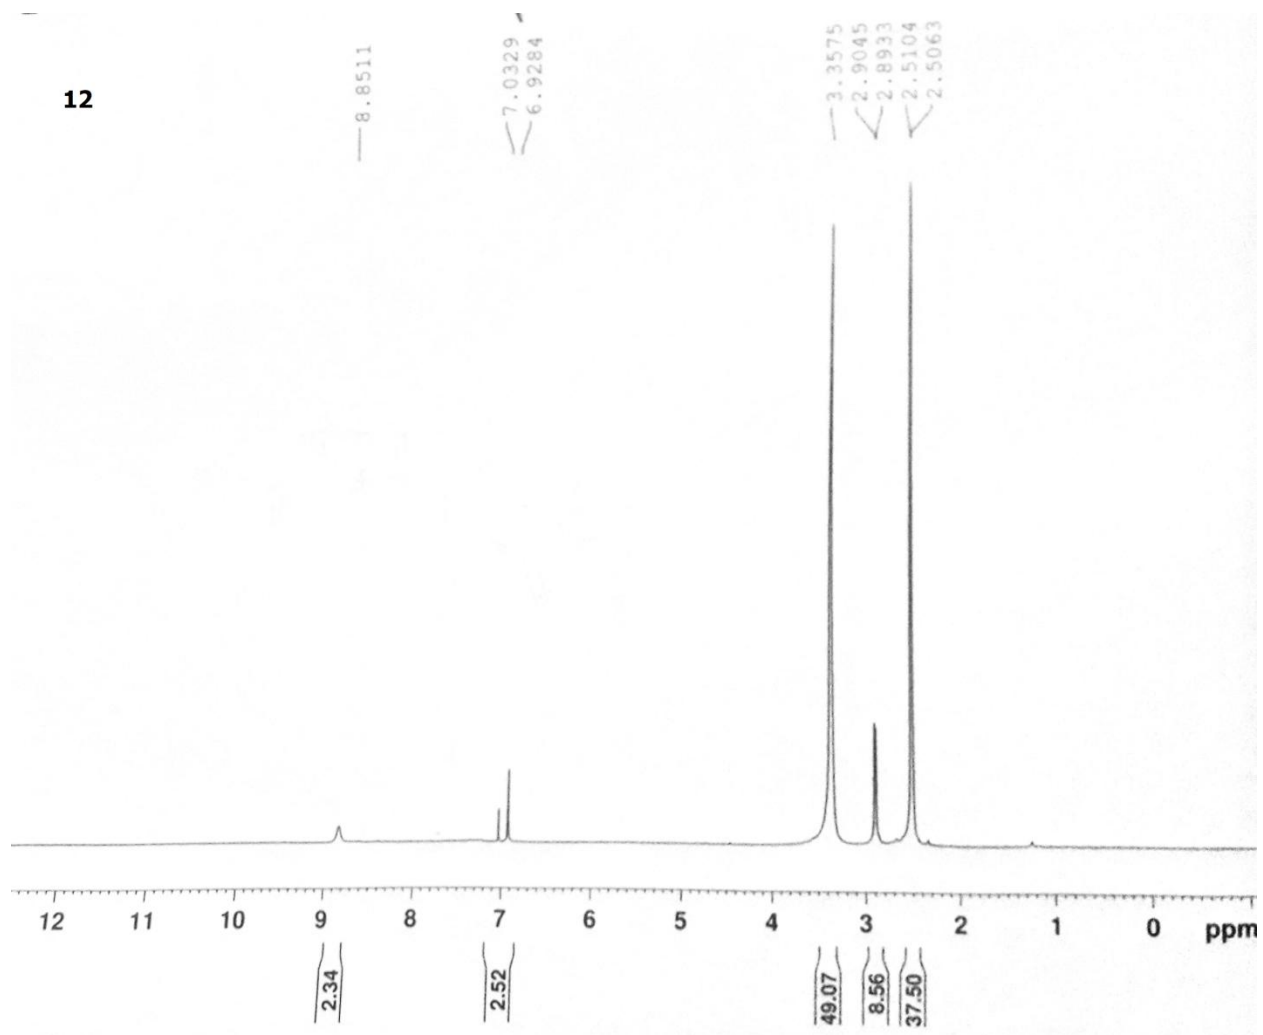

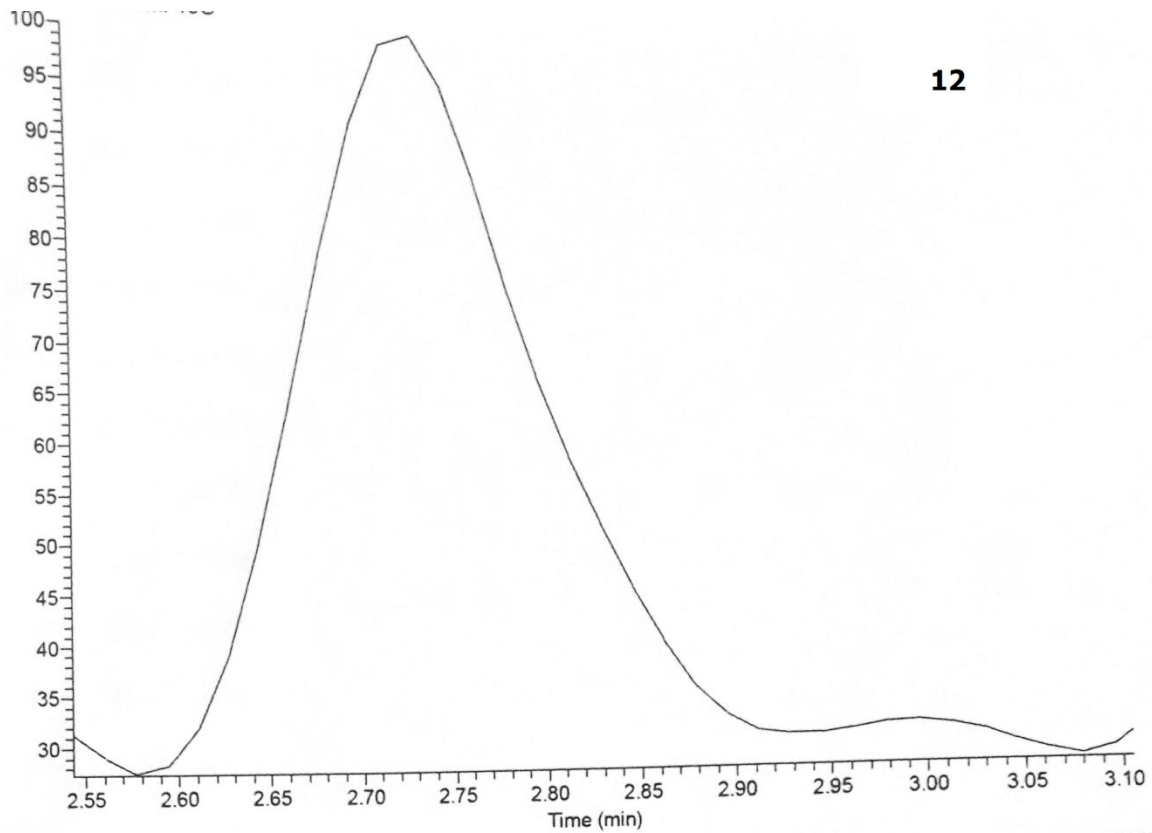

12

sh6 #256 RT: 4.30 AV: 1 NL: 4.11E2  
 F: (0,0) + c EI Full ms [40.00-1000.00]

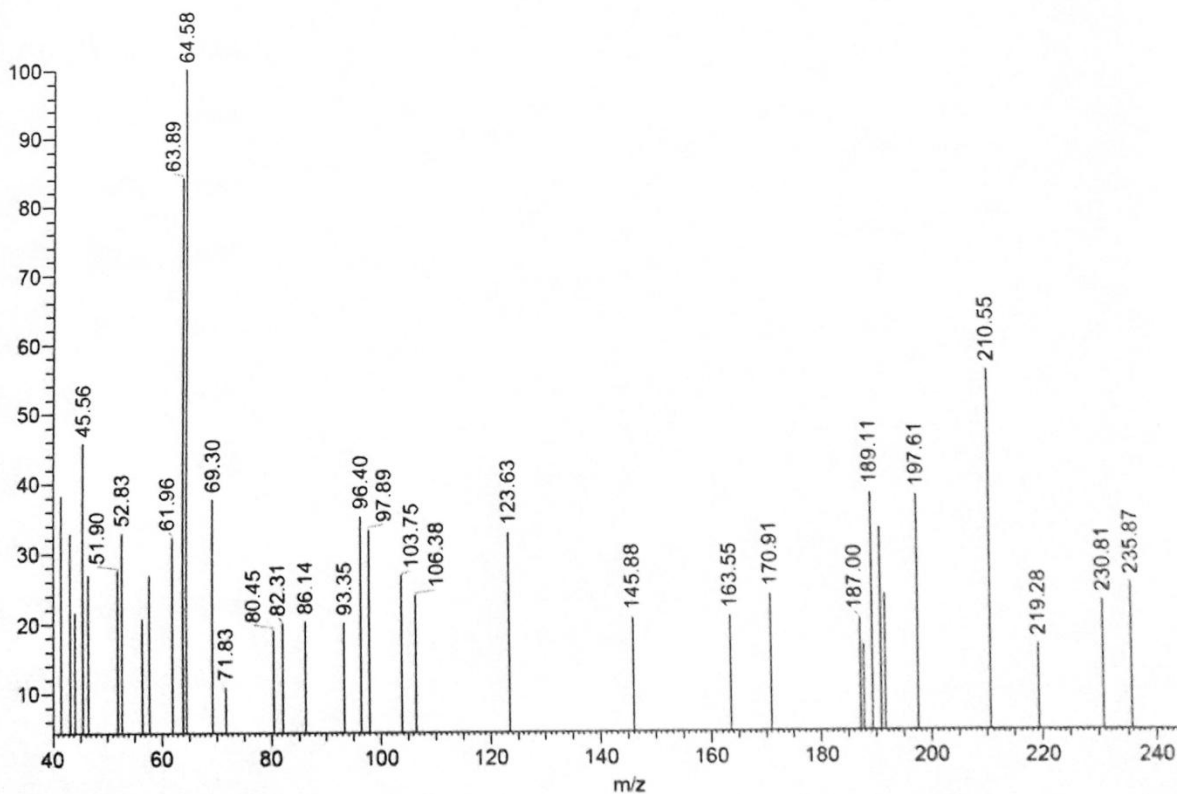

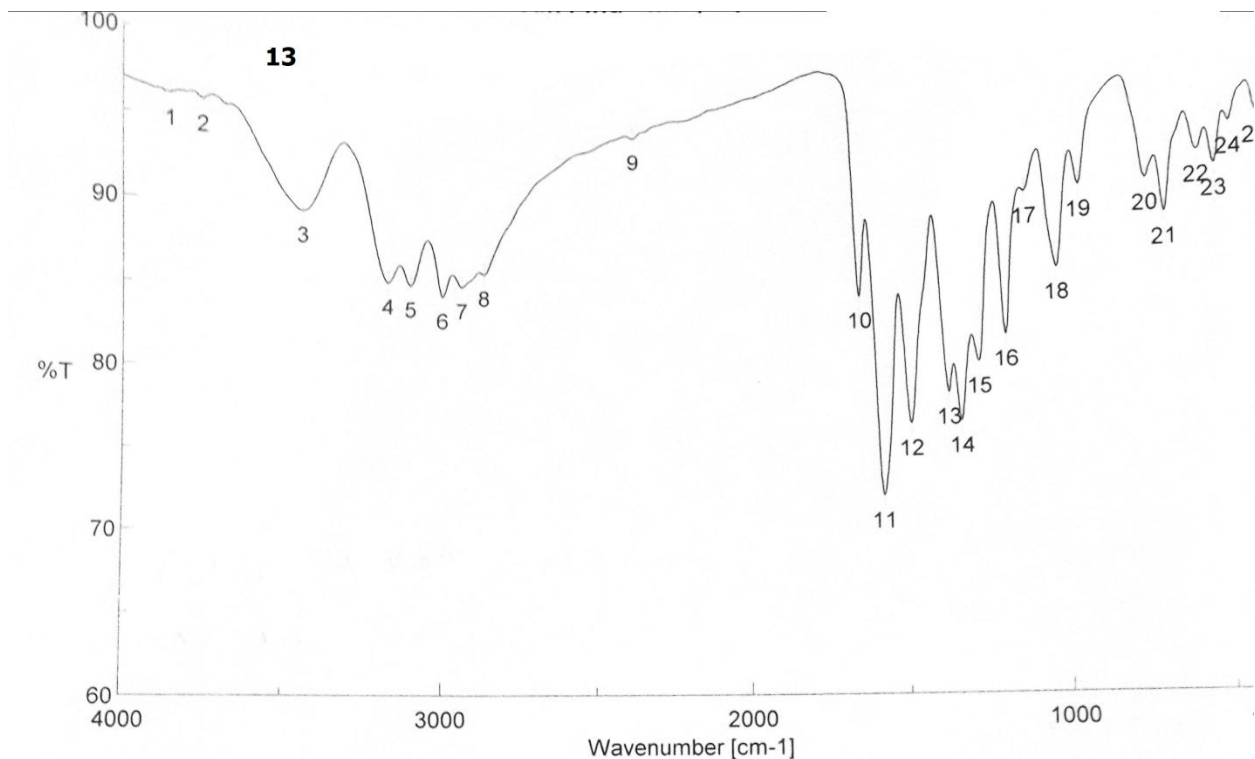

[Comments]  
 Sample name SH 6  
 Comment 6/2018  
 User IR  
 Division IR  
 Company MAC

[ Result of Peak Picking ]

| No. | Position | Intensity | No. | Position | Intensity | No. | Position | Intensity |
|-----|----------|-----------|-----|----------|-----------|-----|----------|-----------|
| 1   | 3855.01  | 96.2807   | 2   | 3752.8   | 96.1058   | 3   | 3438.46  | 89.6872   |
| 1   | 3165.58  | 85.267    | 5   | 3094.23  | 85.0812   | 6   | 2991.05  | 84.3754   |
| 1   | 2929.34  | 84.9898   | 8   | 2858.95  | 85.8038   | 9   | 2375.87  | 94.5437   |
| 0   | 1649.8   | 84.2043   | 11  | 1579.41  | 71.9408   | 12  | 1491.67  | 76.2948   |
| 3   | 1372.1   | 78.1473   | 14  | 1333.53  | 76.4006   | 15  | 1275.68  | 79.9921   |
| 6   | 1189.86  | 81.6008   | 17  | 1126.22  | 90.2535   | 18  | 1027.87  | 85.5647   |
| 9   | 957.484  | 90.4577   | 20  | 751.138  | 90.5705   | 21  | 693.284  | 88.4892   |
| 2   | 593.968  | 92.0406   | 23  | 541.899  | 91.1604   | 24  | 496.58   | 93.5907   |
| 5   | 414.62   | 94.1162   |     |          |           |     |          |           |



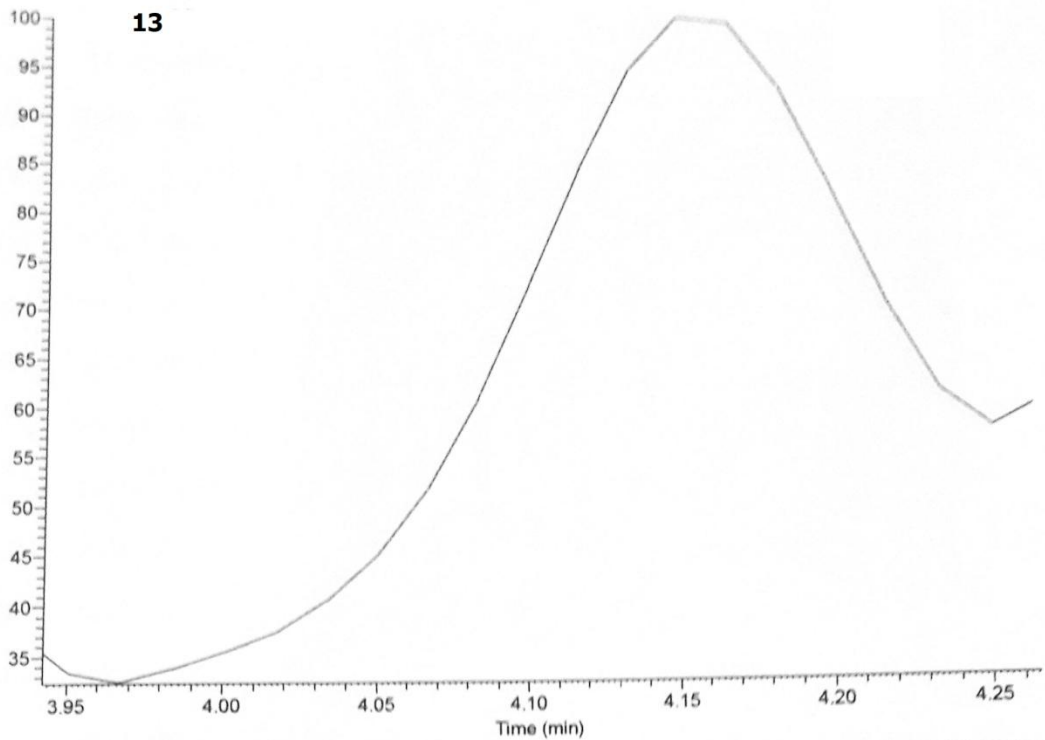

5h5 #282 RT: 4.74 AV: 1 NL: 3.44E2  
 T: (0,0) + c EI Full ms [40.00-1000.00]

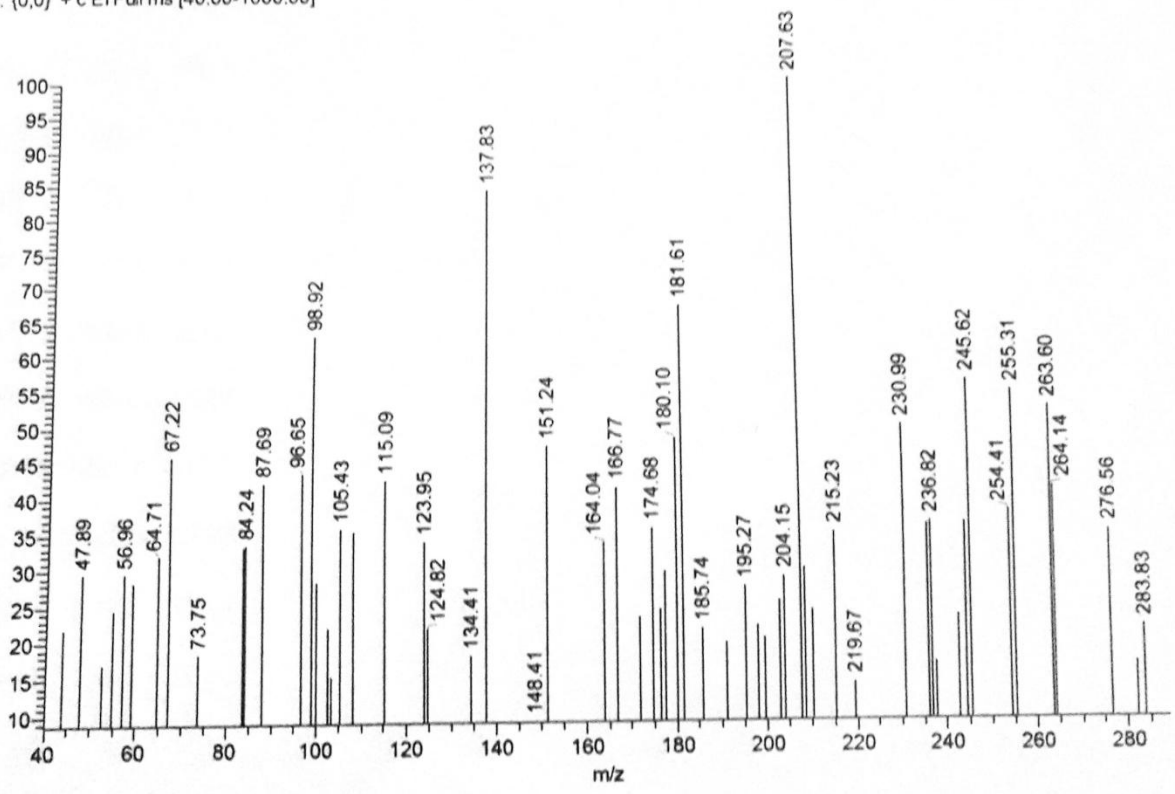

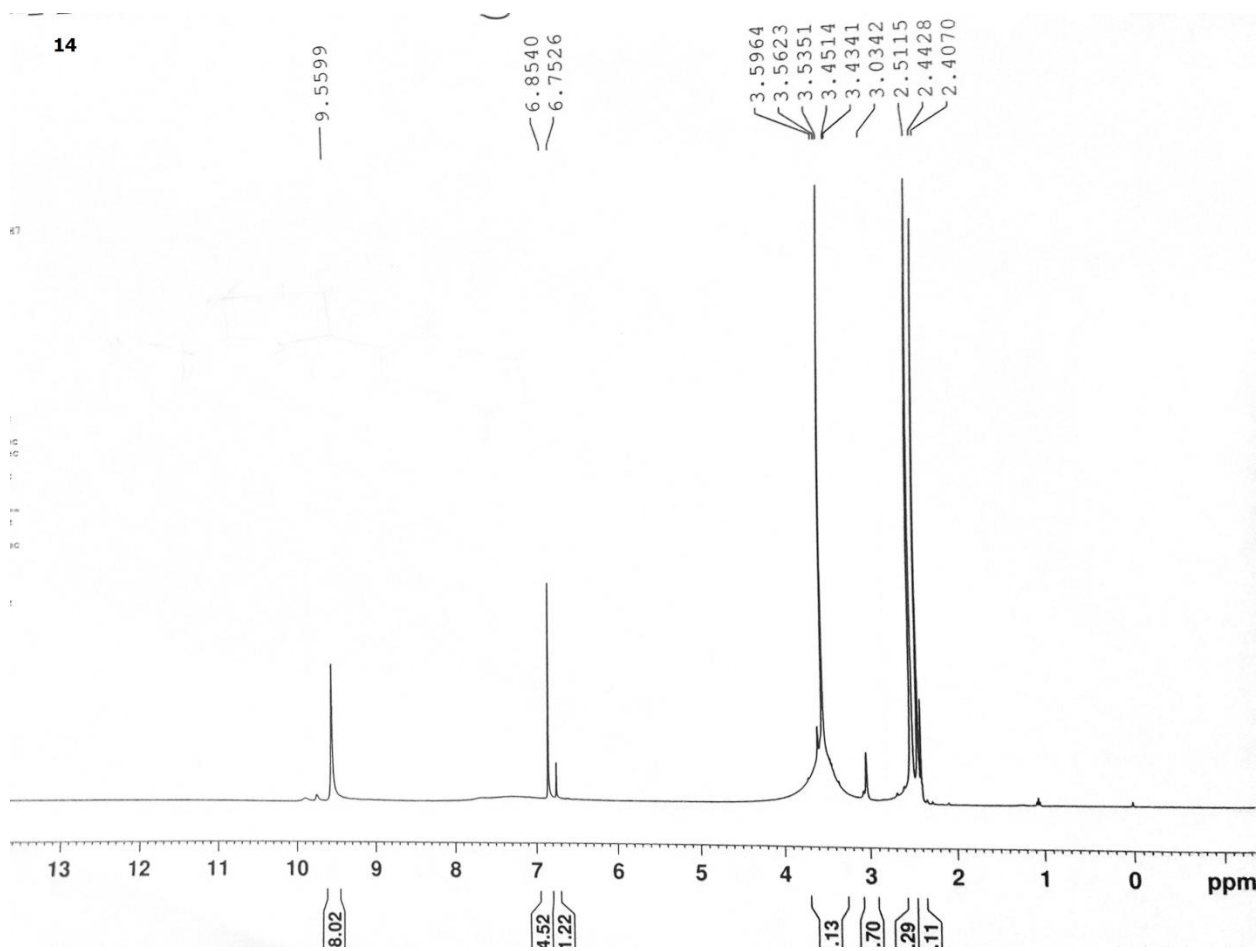

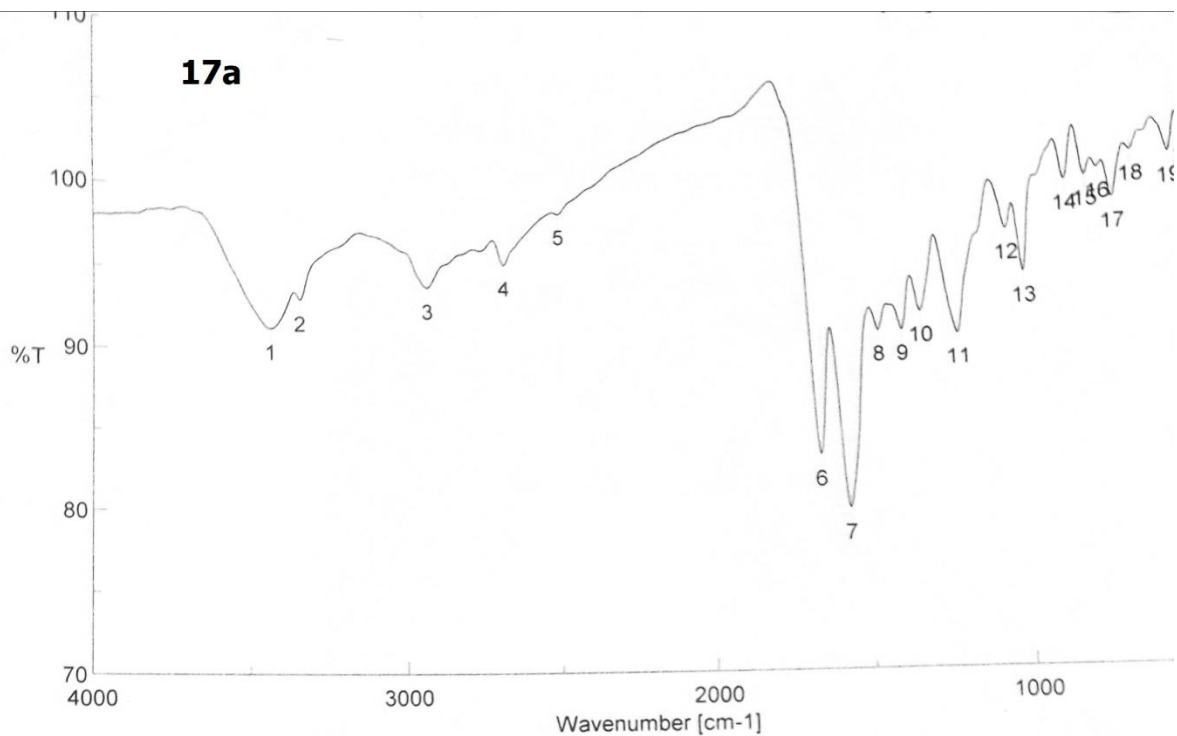

[Comments]  
 Sample name SH 17  
 Comment 6/2018  
 User IR  
 Division IR  
 Company MAC

[ Result of Peak Picking ]

| No. | Position | Intensity | No. | Position | Intensity | No. | Position | Intensity |
|-----|----------|-----------|-----|----------|-----------|-----|----------|-----------|
| 1   | 3433.64  | 91.427    | 2   | 3338.18  | 93.2701   | 3   | 2926.45  | 94.1149   |
| 4   | 2674.78  | 95.6015   | 5   | 2491.58  | 98.9628   | 6   | 1653.66  | 83.1979   |
| 7   | 1564.95  | 79.8526   | 8   | 1455.99  | 90.9884   | 9   | 1380.78  | 91.0034   |
| 10  | 1319.07  | 92.1345   | 11  | 1201.43  | 90.6785   | 12  | 1033.66  | 97.1217   |
| 13  | 983.518  | 94.3792   | 14  | 842.74   | 99.9796   | 15  | 778.136  | 100.131   |
| 16  | 737.639  | 100.543   | 17  | 695.212  | 98.623    | 18  | 632.537  | 101.463   |
| 19  | 514.901  | 101.163   | 20  | 458.011  | 102.308   |     |          |           |



[Comments]  
 Sample name SH 17  
 Comment 6/2018  
 User IR  
 Division IR  
 Company MAC

[ Result of Peak Picking ]

| No. | Position | Intensity | No. | Position | Intensity | No. | Position | Intensity |
|-----|----------|-----------|-----|----------|-----------|-----|----------|-----------|
| 1   | 3433.64  | 91.427    | 2   | 3338.18  | 93.2701   | 3   | 2926.45  | 94.1149   |
| 4   | 2674.78  | 95.6015   | 5   | 2491.58  | 98.9628   | 6   | 1653.66  | 83.1979   |
| 7   | 1564.95  | 79.8526   | 8   | 1455.99  | 90.9884   | 9   | 1380.78  | 91.0034   |
| 10  | 1319.07  | 92.1345   | 11  | 1201.43  | 90.6785   | 12  | 1033.66  | 97.1217   |
| 13  | 983.518  | 94.3792   | 14  | 842.74   | 99.9796   | 15  | 778.136  | 100.131   |
| 16  | 737.639  | 100.543   | 17  | 695.212  | 98.623    | 18  | 632.537  | 101.463   |
| 19  | 514.901  | 101.163   | 20  | 458.011  | 102.308   |     |          |           |

17a

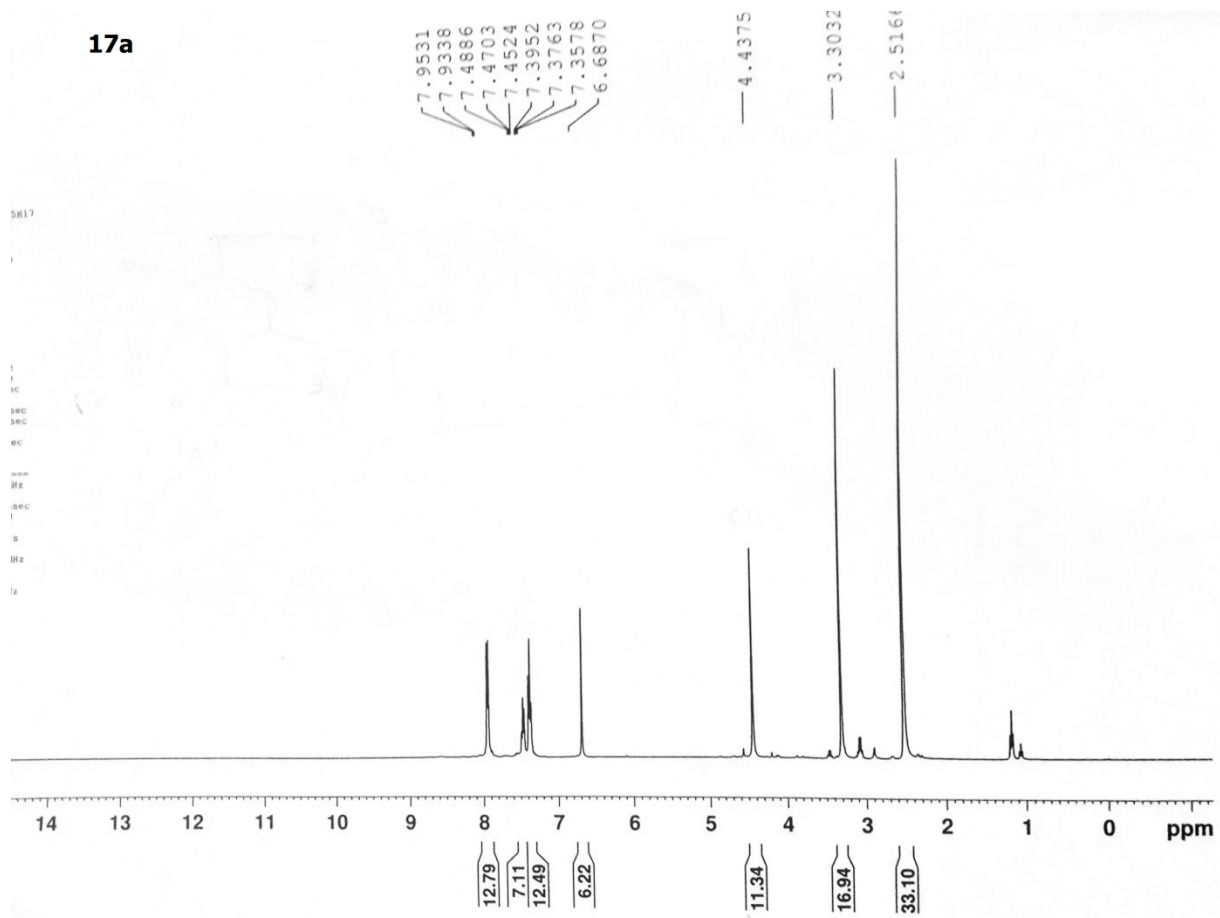

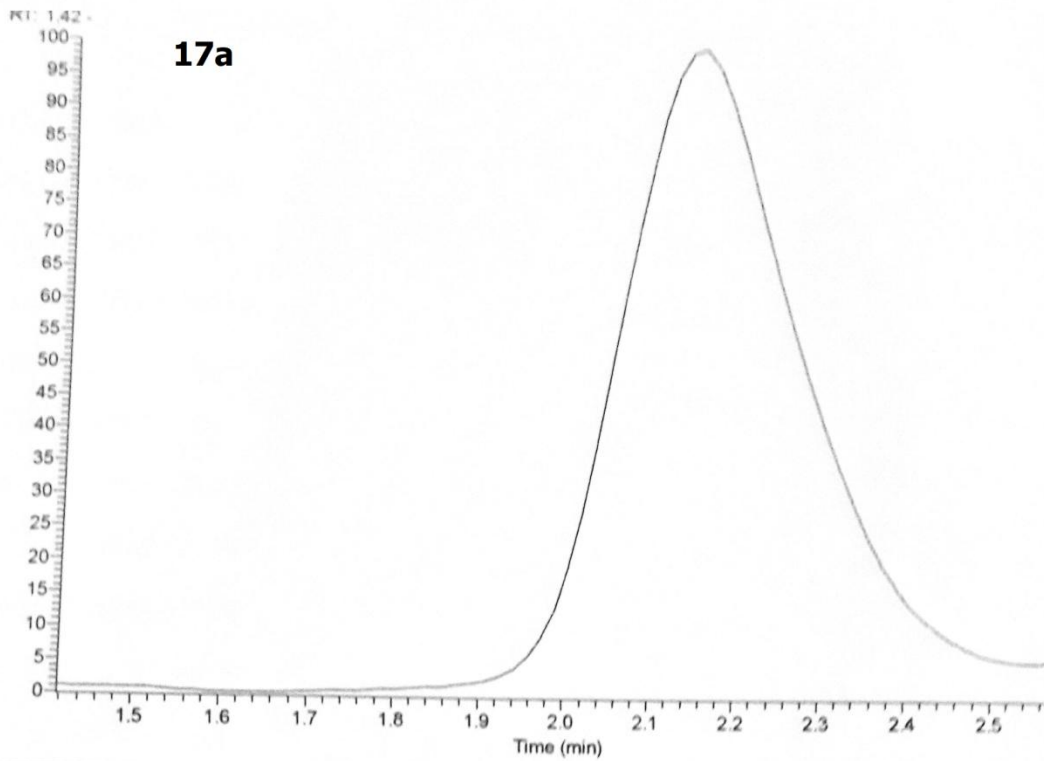

5h17 #192 RT: 3.23 AV: 1 NL: 2.77E2  
 T: (0,0) + c EI Full ms [40.00-1000.00]

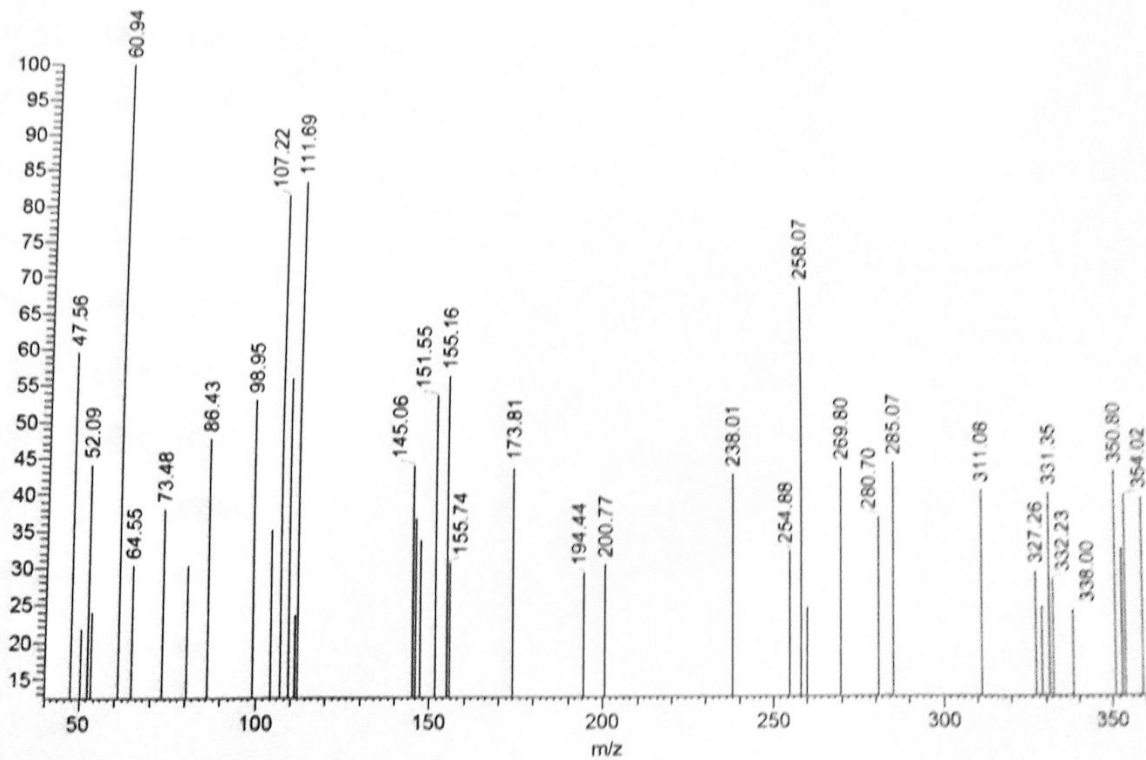

17a

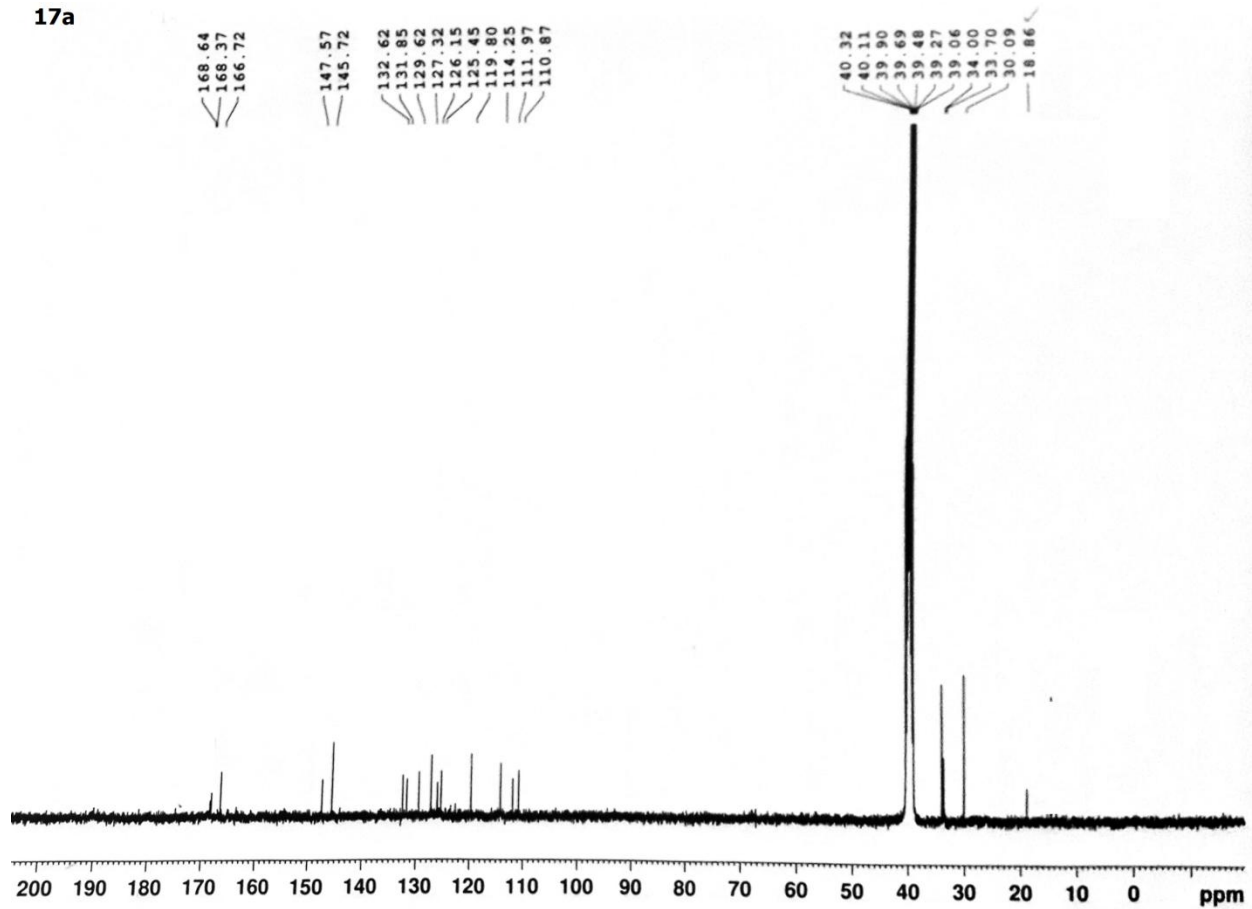

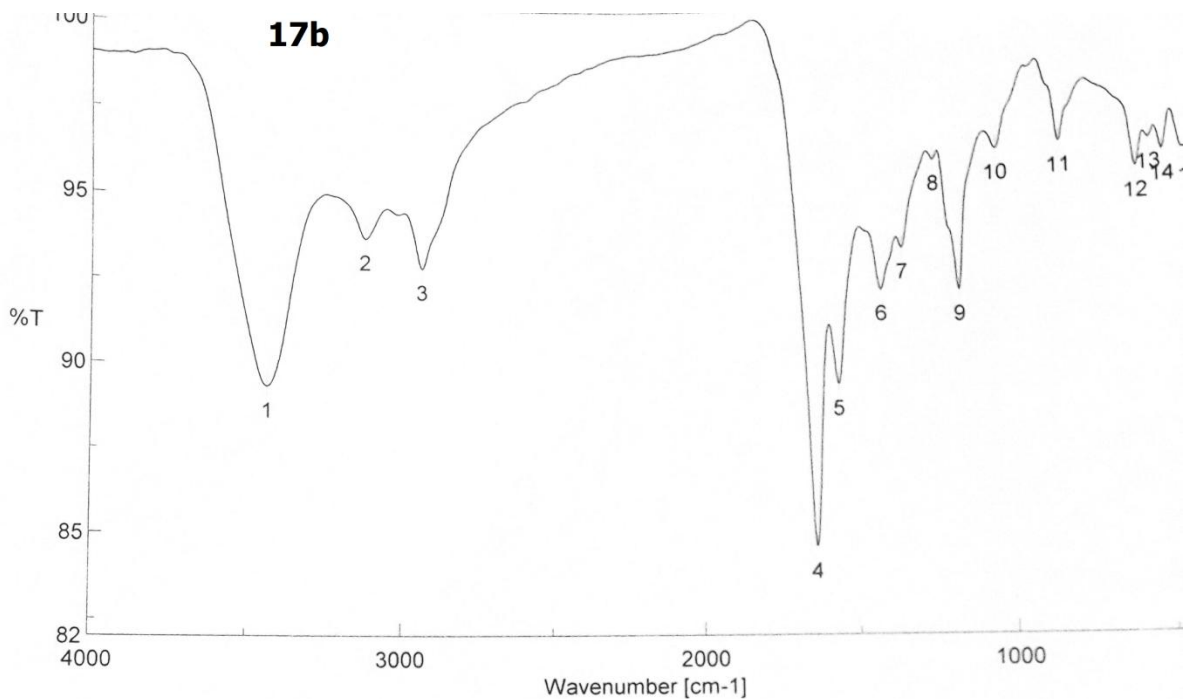

[Comments]

Sample name SH 18  
 Comment 6/2018  
 User IR  
 Division IR  
 Company MAC

[ Result of Peak Picking ]

| No. | Position | Intensity | No. | Position | Intensity | No. | Position | Intensity |
|-----|----------|-----------|-----|----------|-----------|-----|----------|-----------|
| 1   | 3430.74  | 89.348    | 2   | 3114.47  | 93.8009   | 3   | 2928.38  | 92.9064   |
| 4   | 1636.3   | 84.5798   | 5   | 1560.13  | 89.3871   | 6   | 1417.42  | 92.2107   |
| 7   | 1347.03  | 93.4573   | 8   | 1240     | 96.0959   | 9   | 1163.83  | 92.1475   |
| 10  | 1037.52  | 96.3368   | 11  | 835.026  | 96.4471   | 12  | 593.968  | 95.5555   |
| 13  | 552.506  | 96.3766   | 14  | 511.044  | 96.0017   | 15  | 422.334  | 95.8984   |



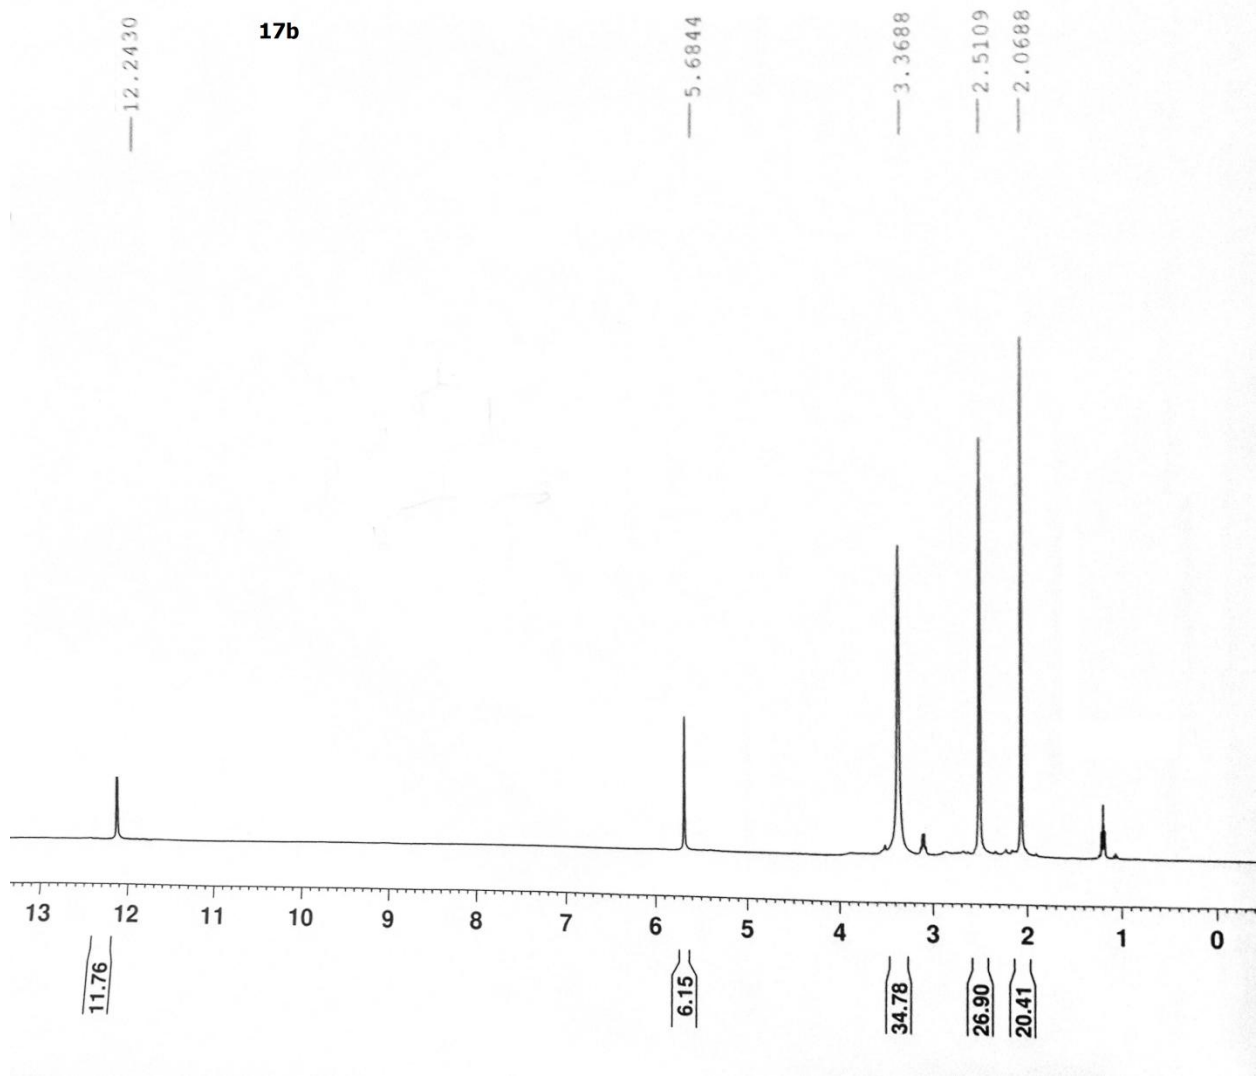

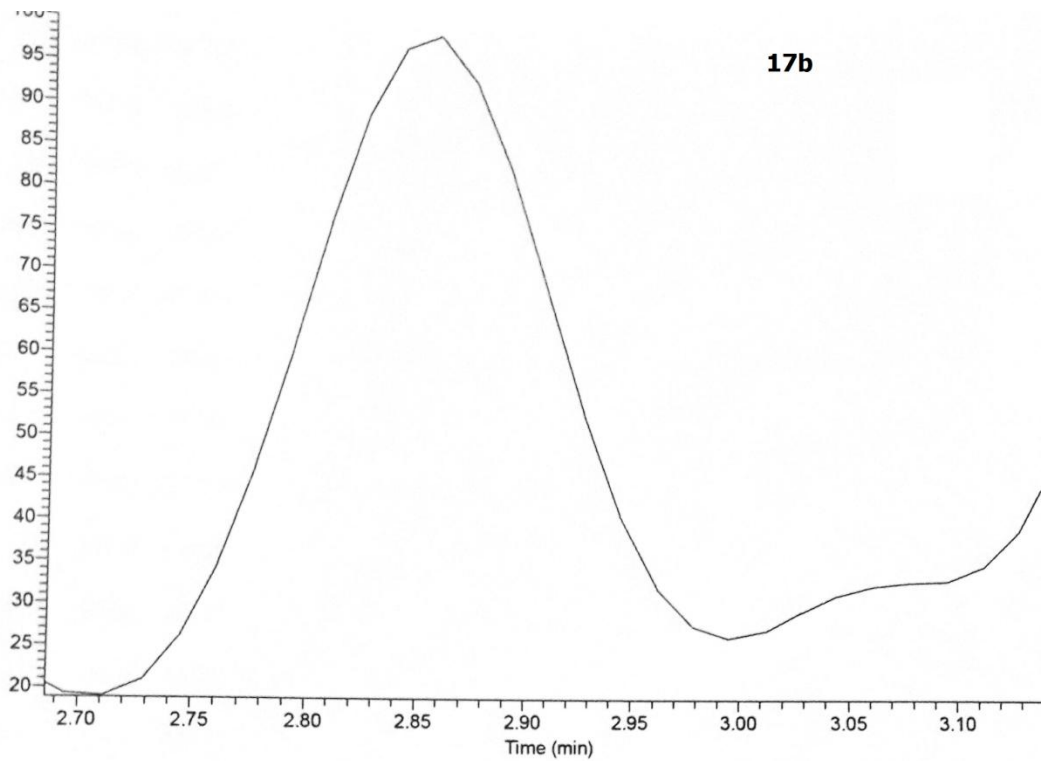

5h18 #193 RT: 3.25 AV: 1 NL: 4.85E2  
 T: (0,0) + c EI Full ms [40.00-1000.00]

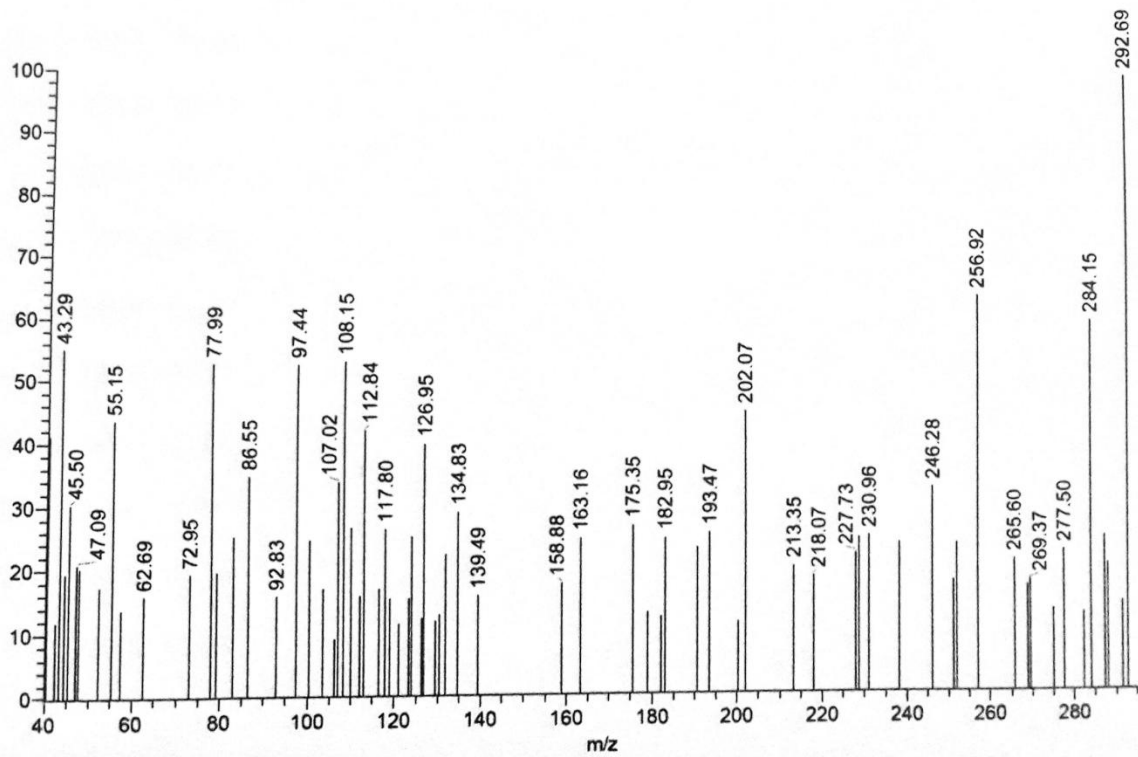

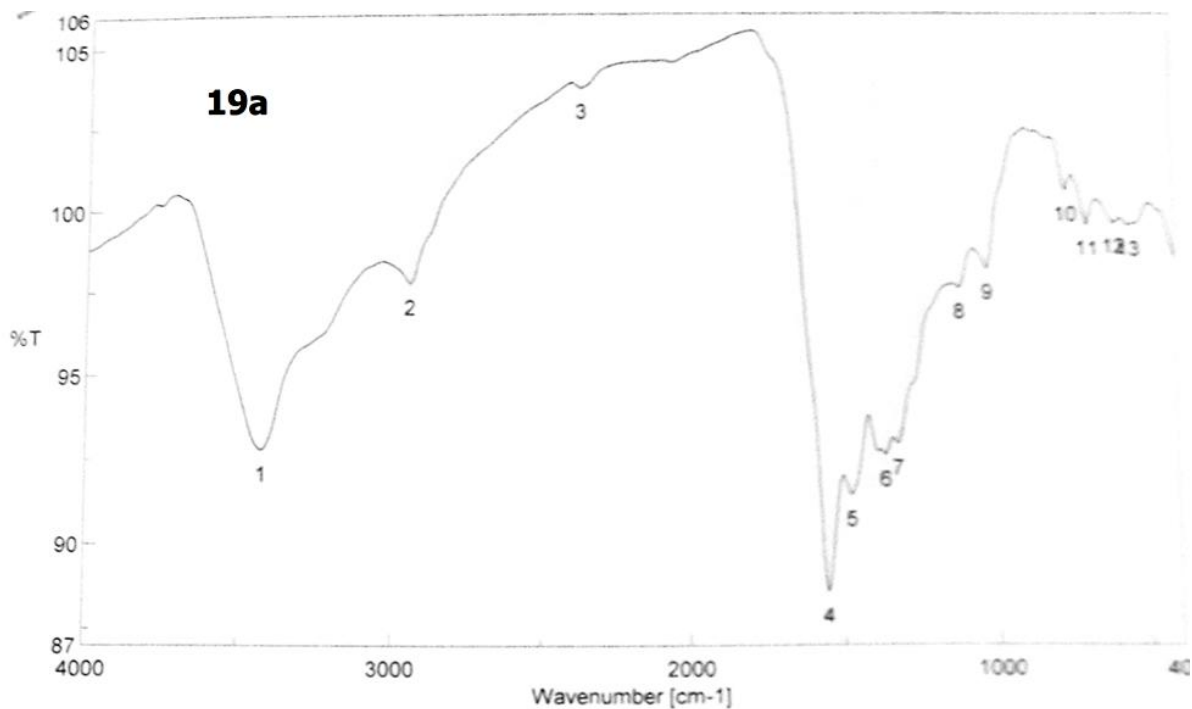

[Comments]  
 Sample name SH 11  
 Comment 6/2018  
 User IR  
 Division IR  
 Company MAC

[ Result of Peak Picking ]

| No. | Position | Intensity | No. | Position | Intensity | No. | Position | Intensity |
|-----|----------|-----------|-----|----------|-----------|-----|----------|-----------|
| 1   | 3419.17  | 92.7854   | 2   | 2929.34  | 97.7475   | 3   | 2362.37  | 103.713   |
| 4   | 1554.34  | 88.5783   | 5   | 1480.1   | 91.4049   | 6   | 1370.18  | 92.566    |
| 7   | 1330.64  | 92.905    | 8   | 1124.3   | 97.5709   | 9   | 1029.8   | 98.1671   |
| 10  | 760.78   | 100.58    | 11  | 691.355  | 99.5347   | 12  | 601.682  | 99.6101   |
| 13  | 553.47   | 99.5343   |     |          |           |     |          |           |

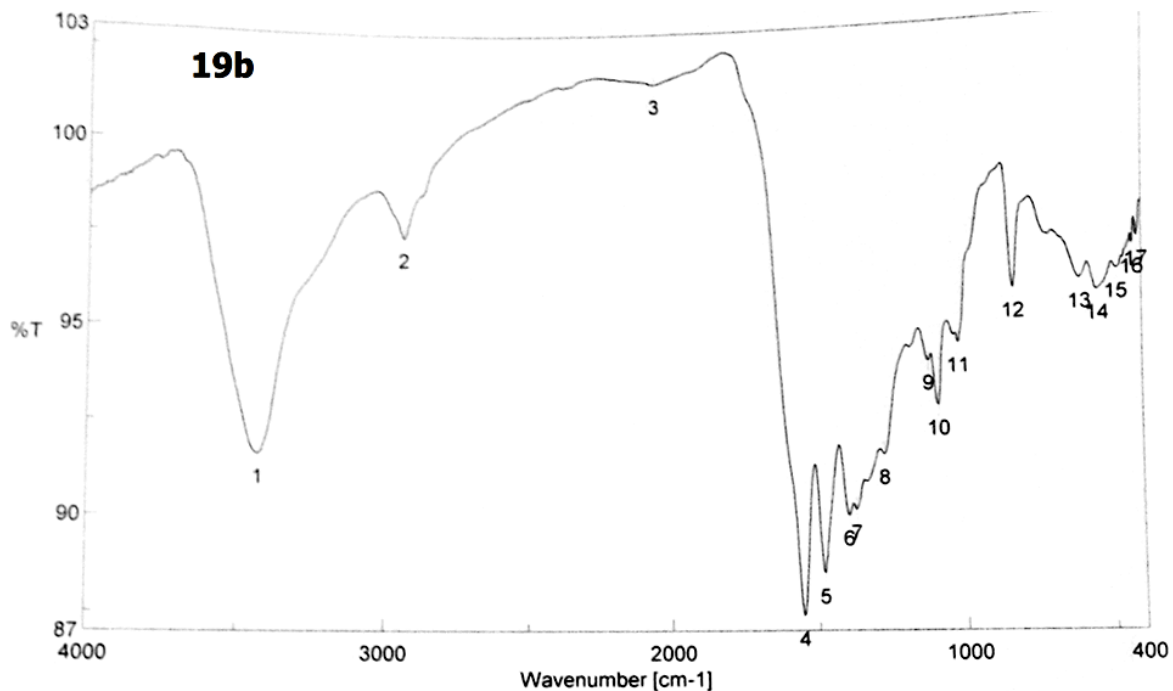

[Comments]  
 Sample name SH 13  
 Comment 6/2018  
 User IR  
 Division IR  
 Company MAC

[ Result of Peak Picking ]

| No. | Position | Intensity | No. | Position | Intensity | No. | Position | Intensity |
|-----|----------|-----------|-----|----------|-----------|-----|----------|-----------|
| 1   | 3423.99  | 91.6275   | 2   | 2925.48  | 97.3724   | 3   | 2049.96  | 101.615   |
| 4   | 1552.42  | 87.3904   | 5   | 1482.03  | 88.4942   | 6   | 1398.14  | 90.0004   |
| 7   | 1373.07  | 90.1508   | 8   | 1275.68  | 91.599    | 9   | 1121.4   | 94.0569   |
| 10  | 1089.58  | 92.8718   | 11  | 1018.23  | 94.5151   | 12  | 827.312  | 95.9205   |
| 13  | 604.574  | 96.105    | 14  | 545.756  | 95.7886   | 15  | 484.045  | 96.3221   |
| 16  | 431.012  | 96.9329   | 17  | 416.549  | 97.127    |     |          |           |

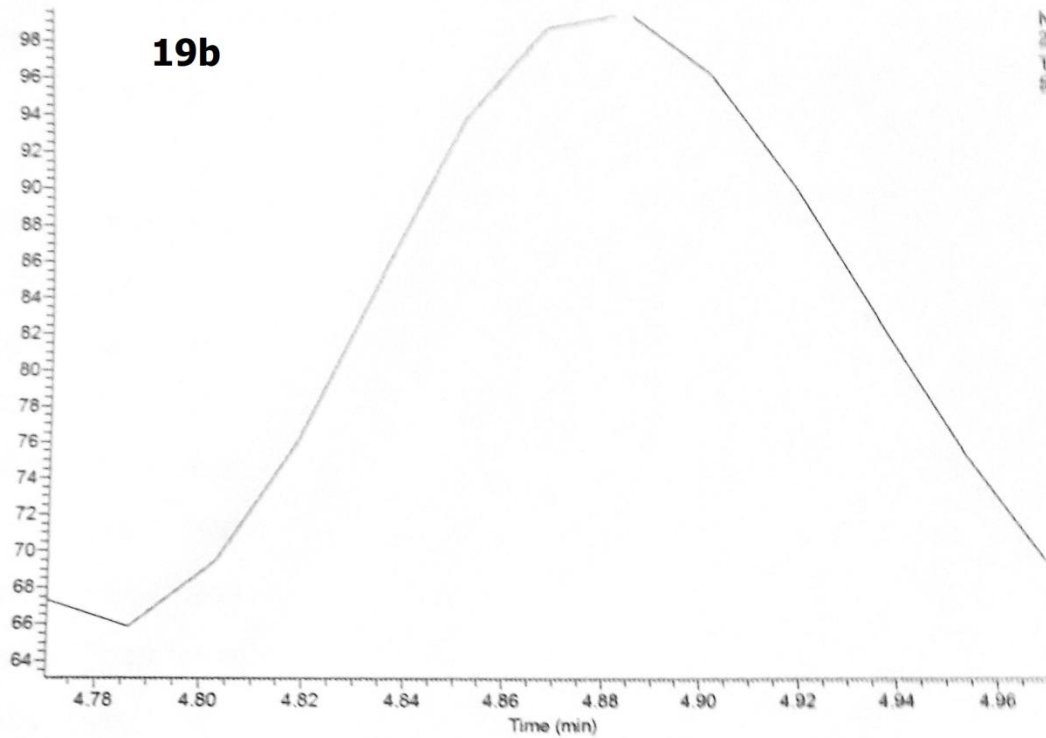

NL:  
2.23E4  
TK: MS  
5H13

5H13 #281 RT: 4.72 AV: 1 NL: 4.36E2  
T: (0.0) + c EI Full ms [40.00-1000.00]

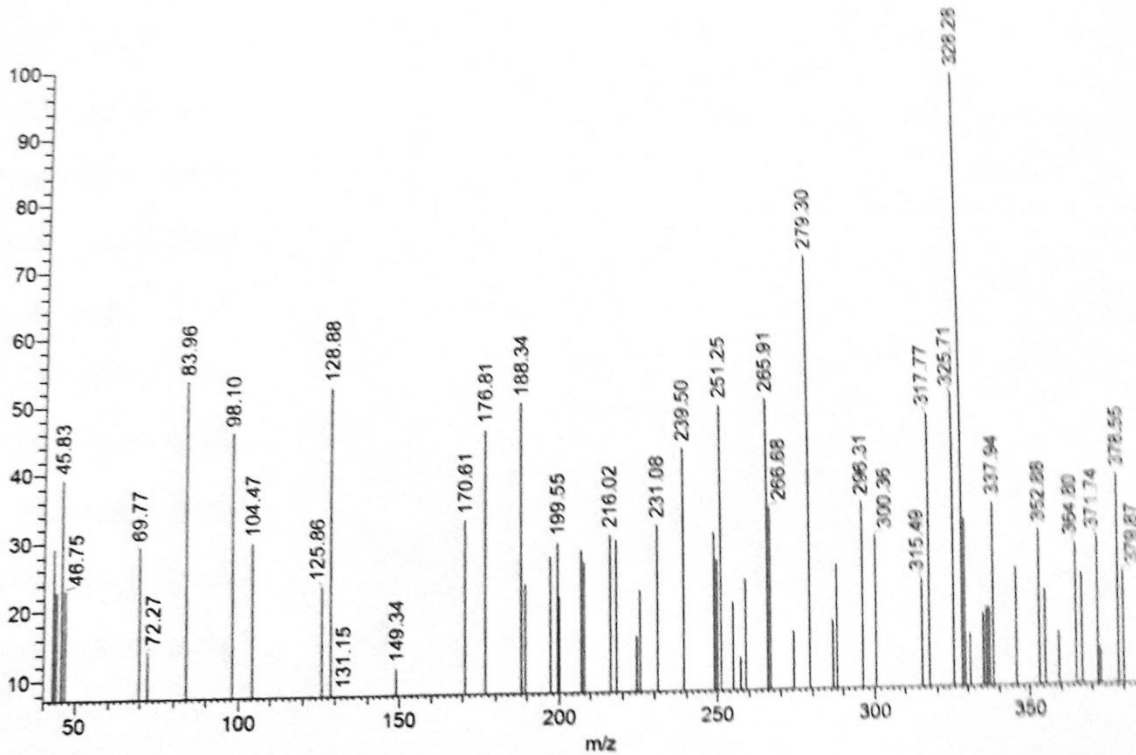

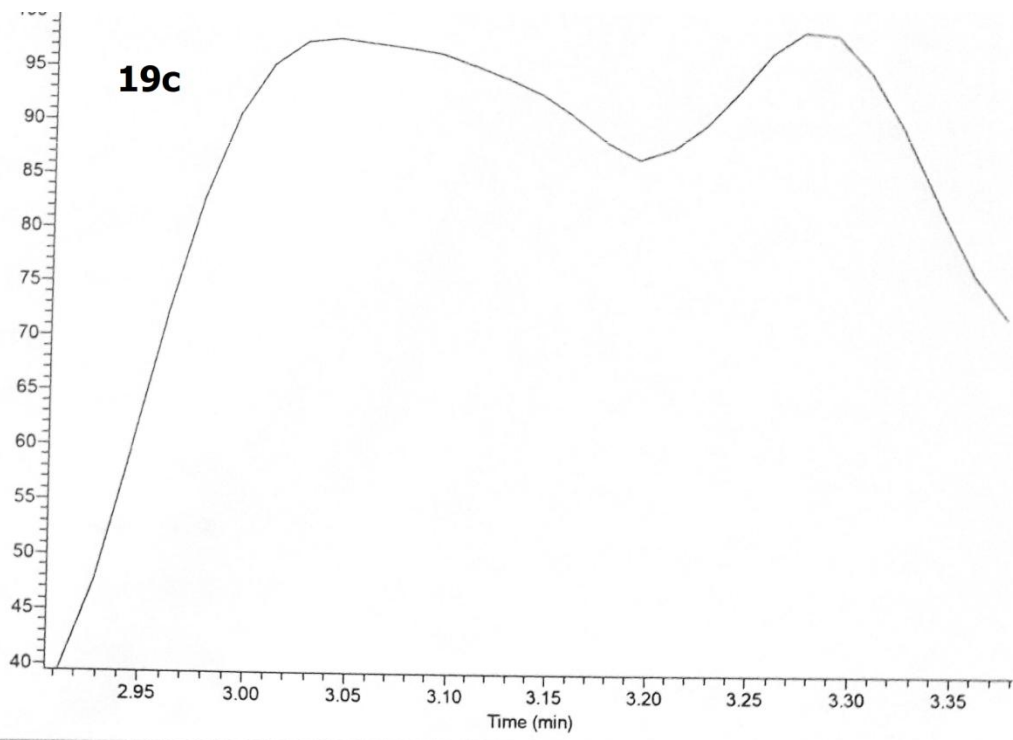

5h14 #192 RT: 3.23 AV: 1 NL: 4.99E2  
 T: (0,0) + c EI Full ms [40.00-1000.00]

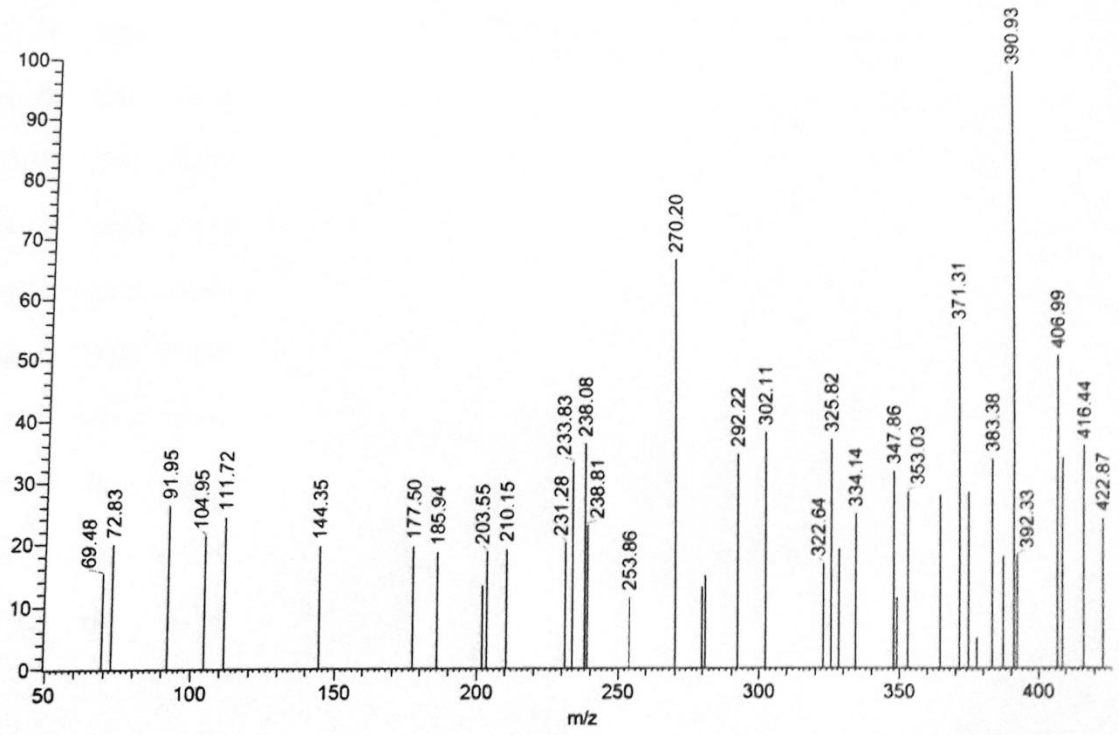

19d

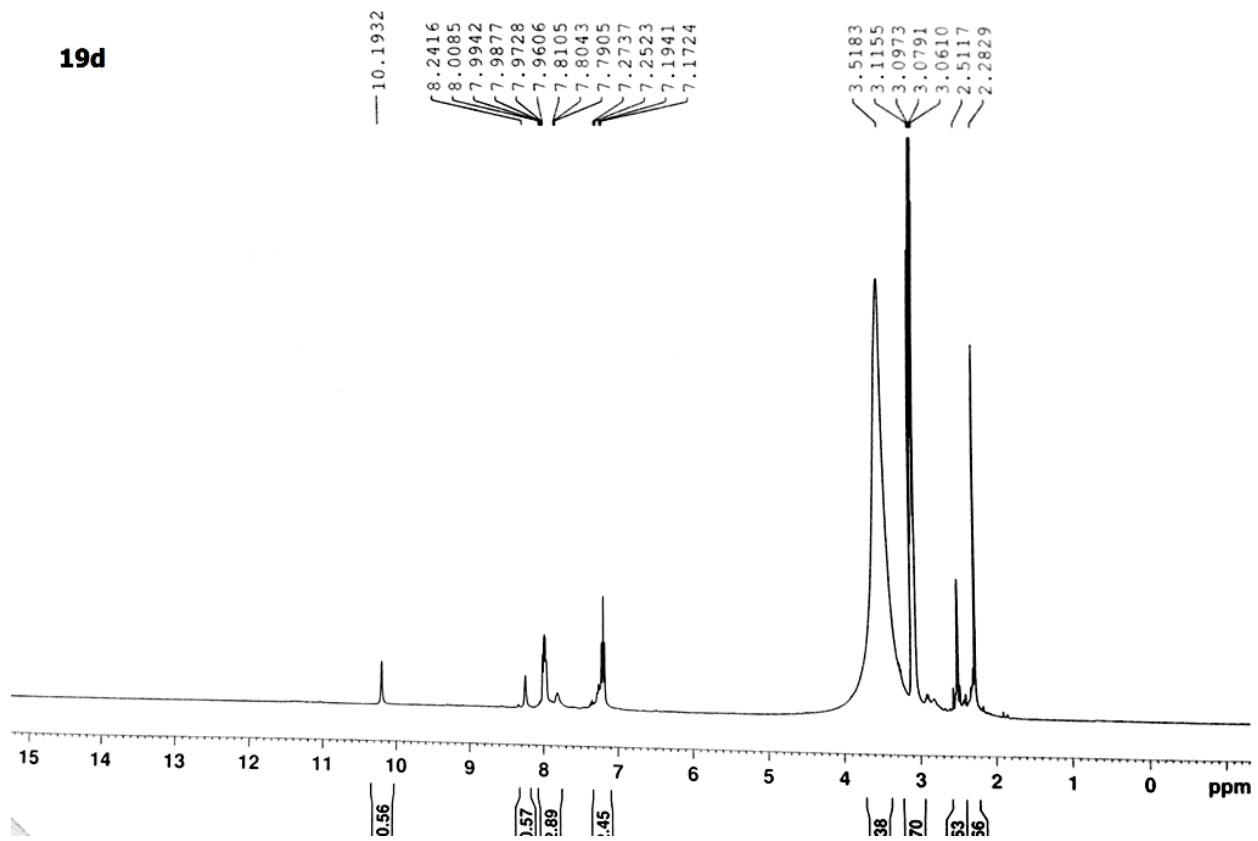

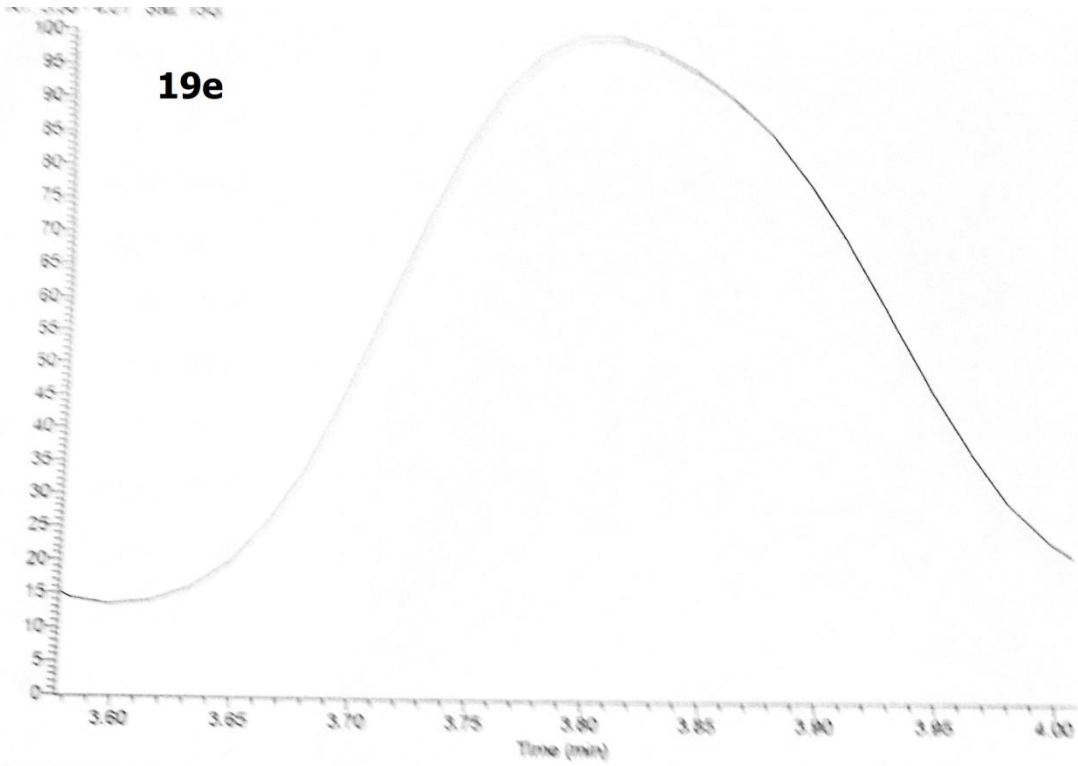

5h12#194 RT: 3.26 AV: 1 NL: 3.24E2  
 T: (0.0) + c EI Full m/z [40.00-1000.00]

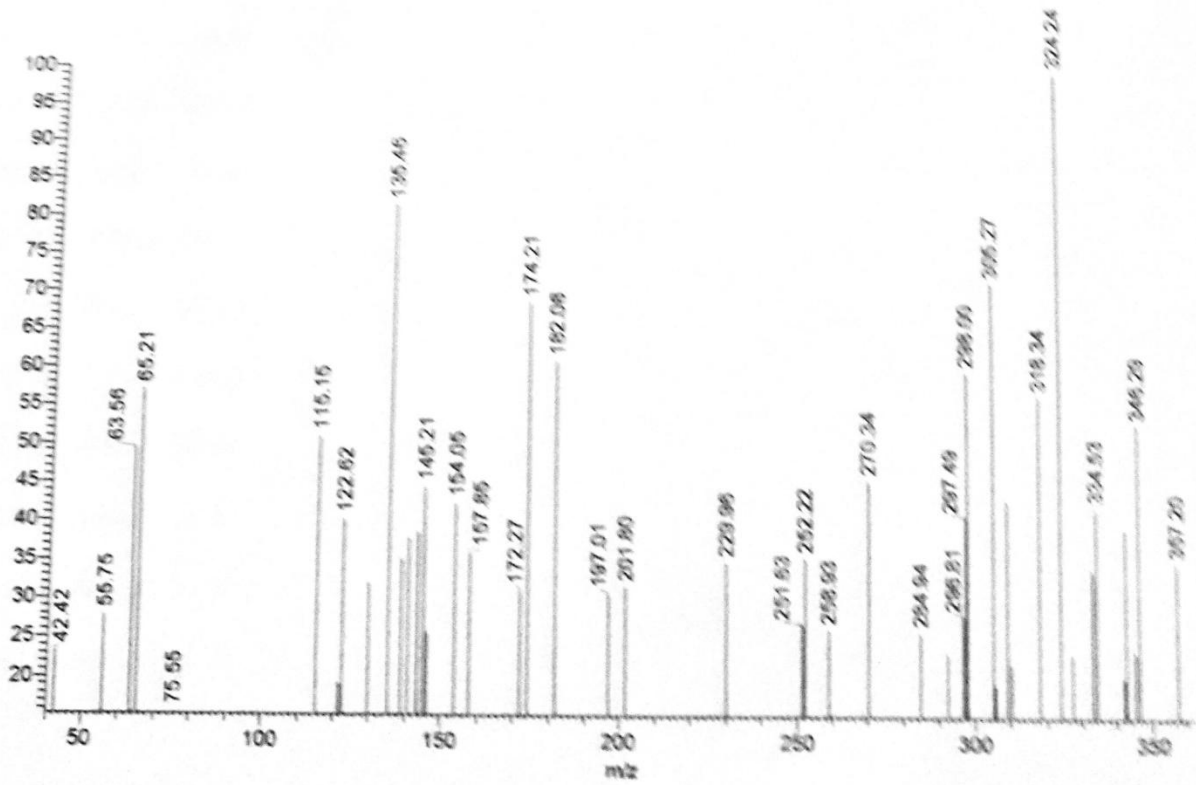



RT: 3.00-3.83 SM: 156

**19f**

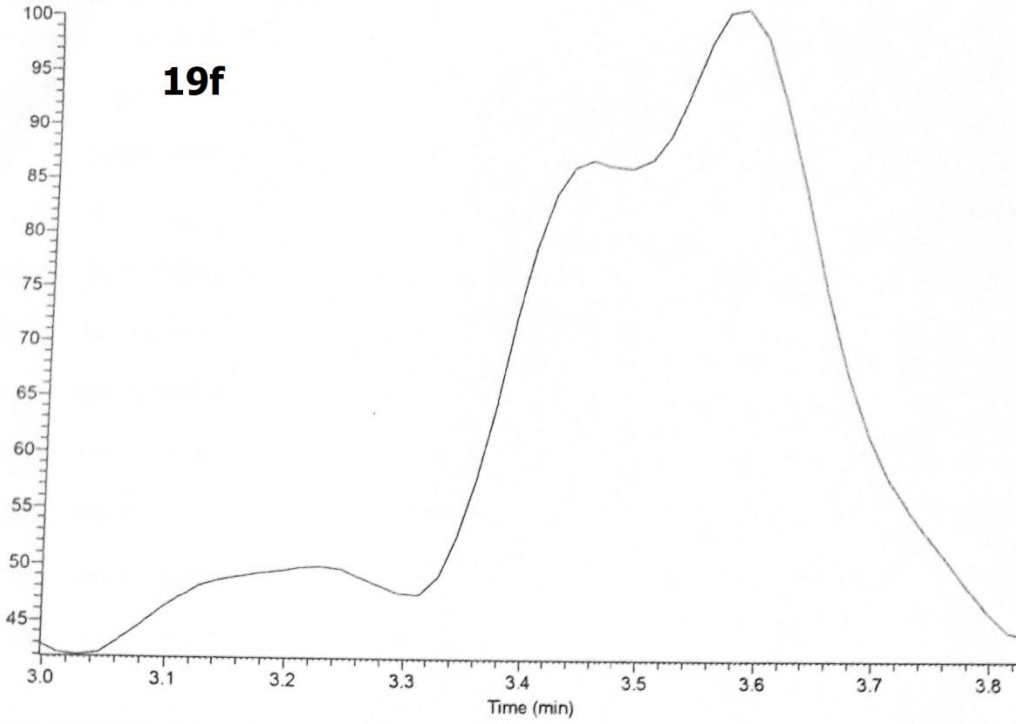

h16 #233 RT: 3.92 AV: 1 NL: 3.74E2  
: (0,0) + c EIFull ms [40.00-1000.00]

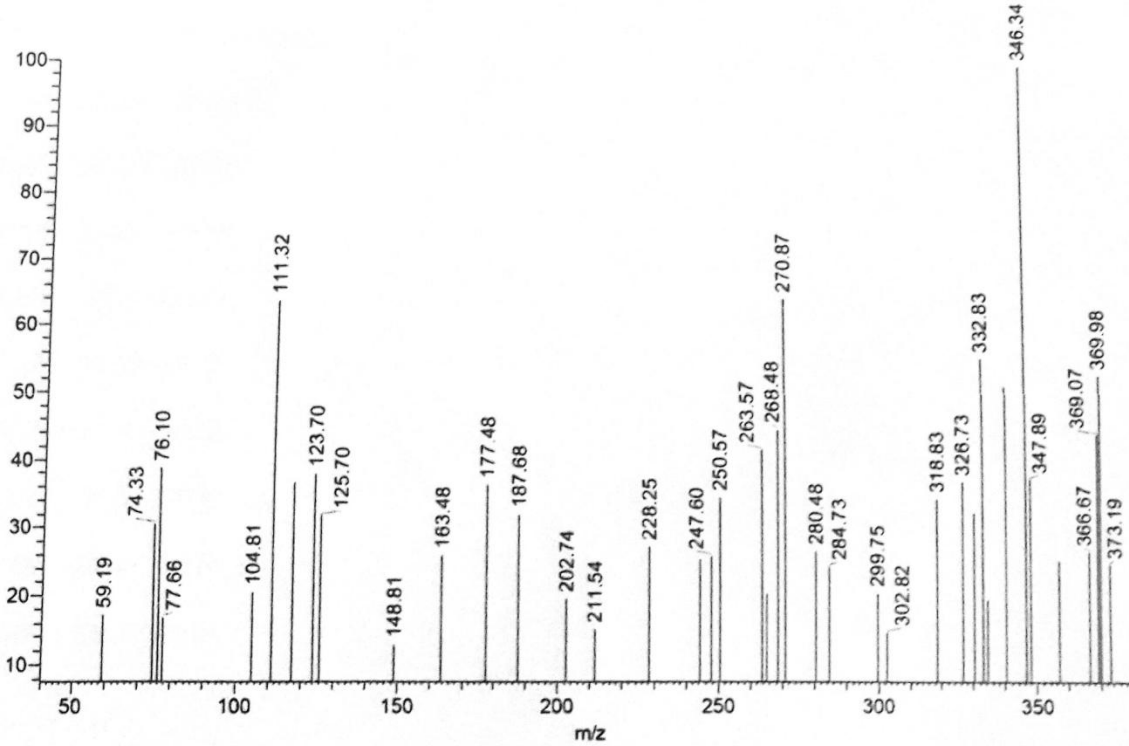

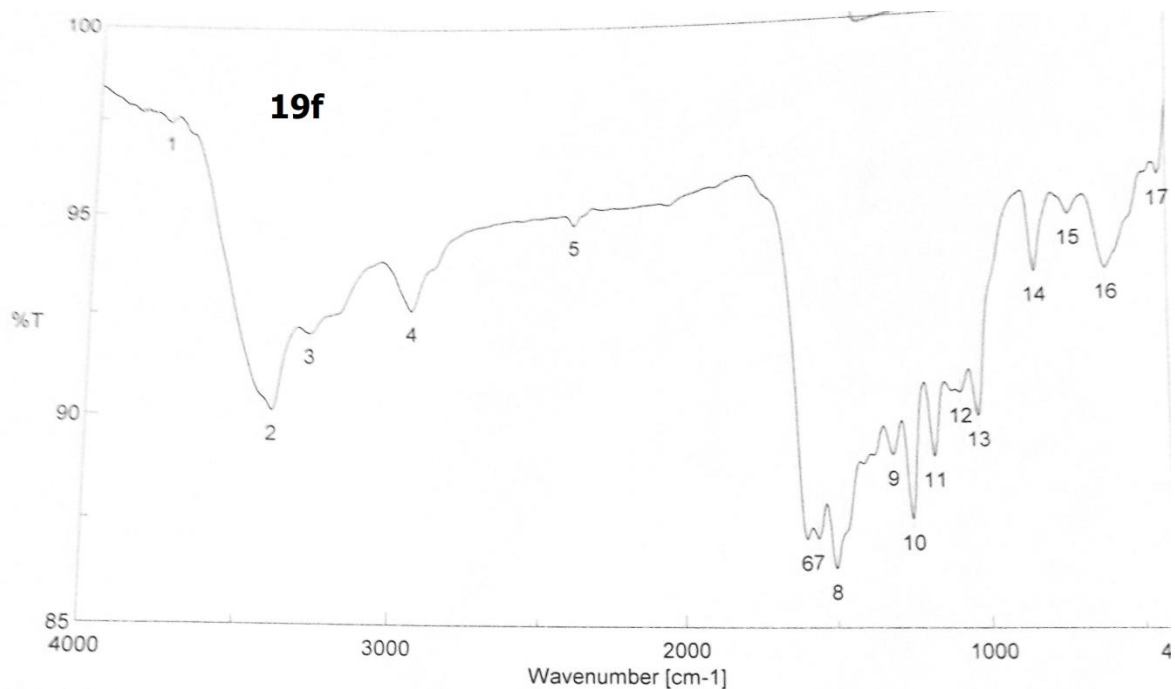

[Comments]  
 Sample name SH 16  
 Comment 6/2018  
 User IR  
 Division IR  
 Company MAC

[ Result of Peak Picking ]

| No. | Position | Intensity | No. | Position | Intensity | No. | Position | Intensity |
|-----|----------|-----------|-----|----------|-----------|-----|----------|-----------|
| 1   | 3752.8   | 97.4128   | 2   | 3386.39  | 90.152    | 3   | 3265.86  | 92.0557   |
| 4   | 2926.45  | 92.6479   | 5   | 2374.91  | 94.8463   | 6   | 1597.73  | 87.1141   |
| 7   | 1560.13  | 87.1277   | 8   | 1502.28  | 86.4138   | 9   | 1311.36  | 89.1524   |
| 10  | 1249.65  | 87.6011   | 11  | 1175.4   | 89.1103   | 12  | 1086.69  | 90.6569   |
| 13  | 1028.84  | 90.0818   | 14  | 832.133  | 93.5772   | 15  | 717.39   | 94.9346   |
| 16  | 597.825  | 93.6022   | 17  | 427.155  | 95.7834   |     |          |           |

21b

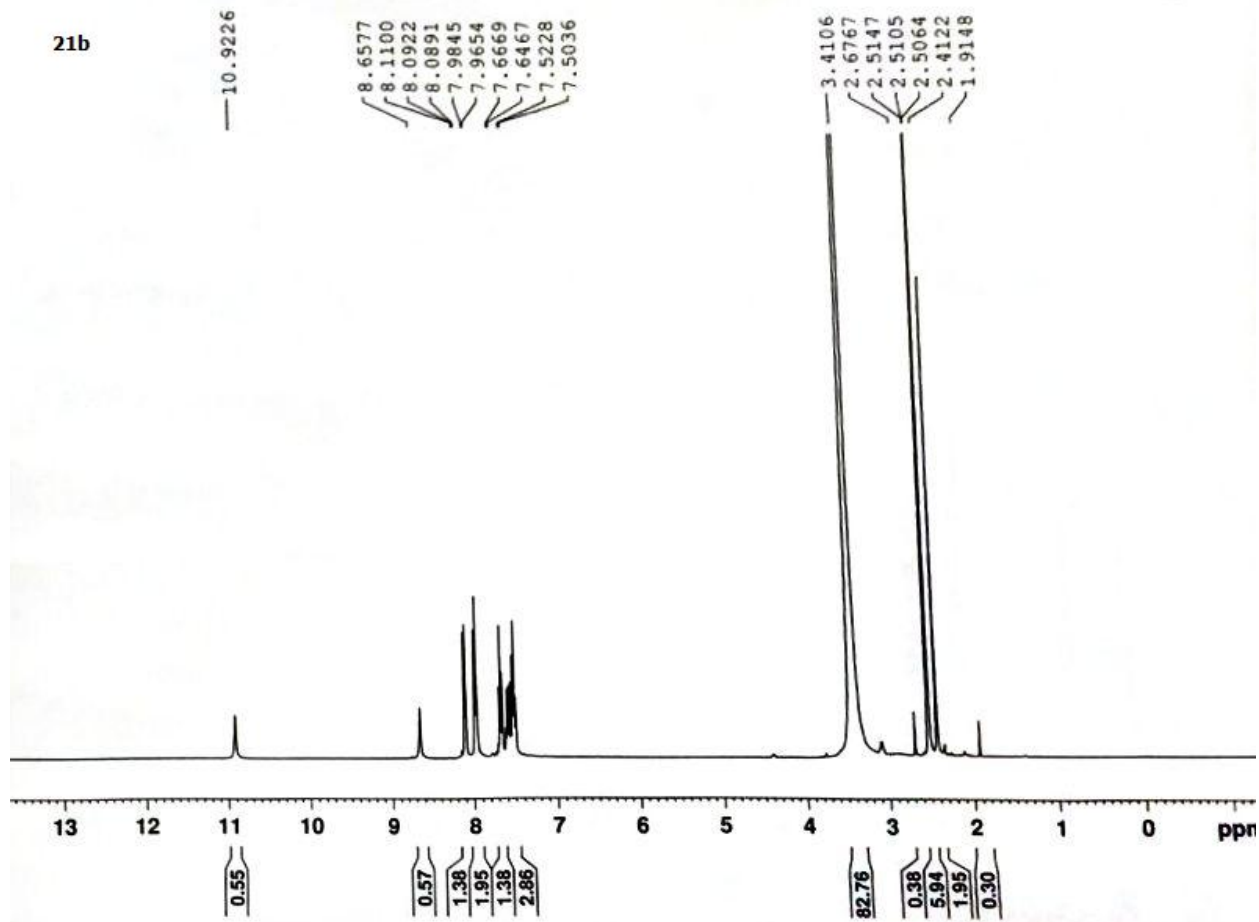

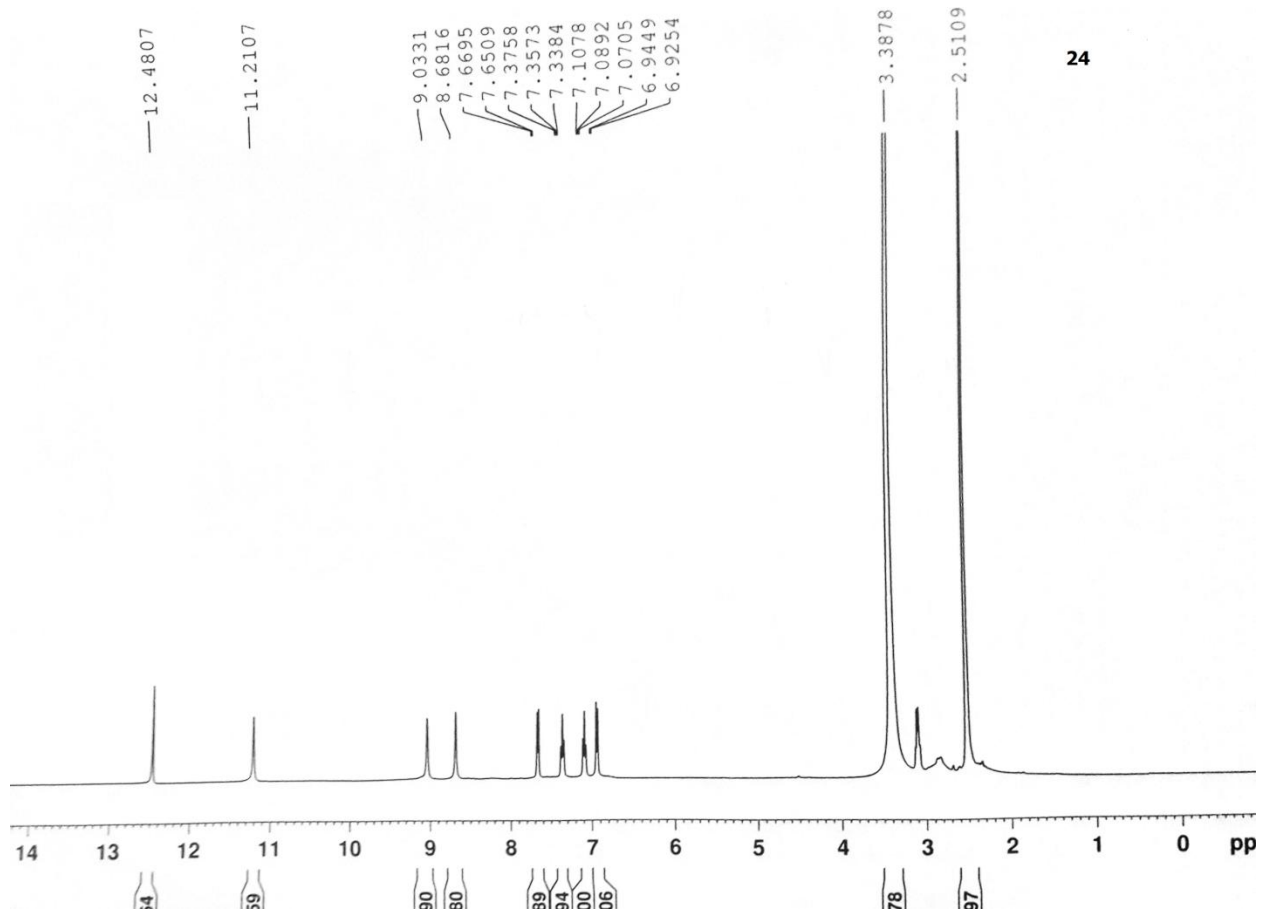

24

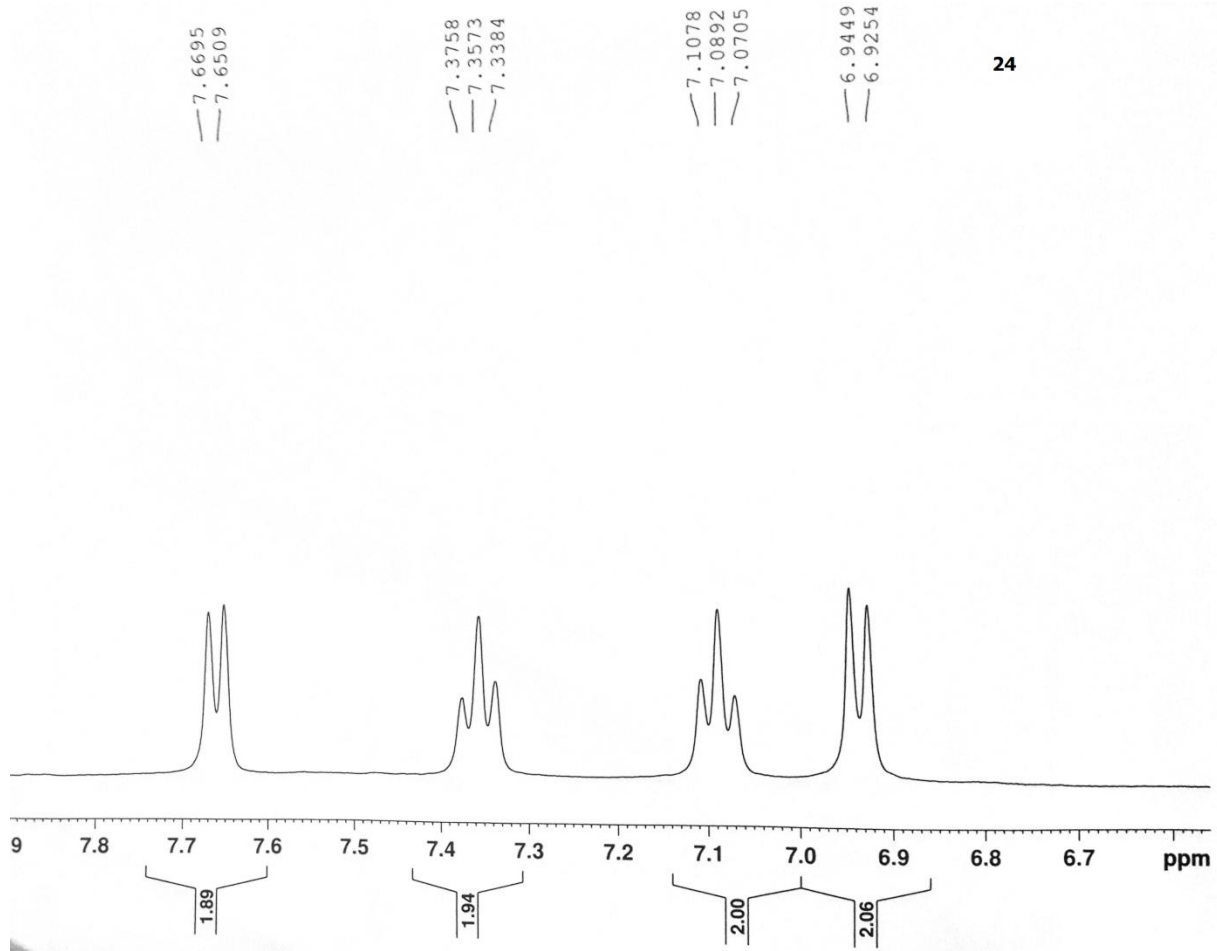

24

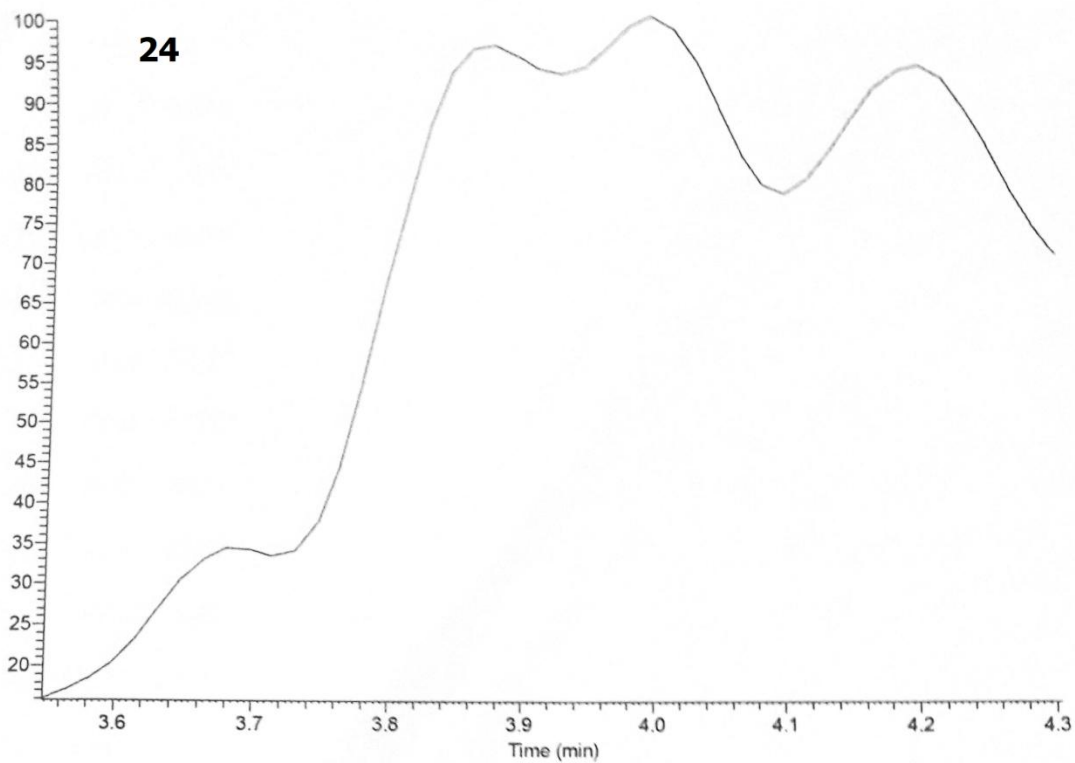

5h22 #250 RT: 4.20 AV: 1 NL: 5.19E2  
 T: {0.0} + c EI Full ms [40.00-1000.00]

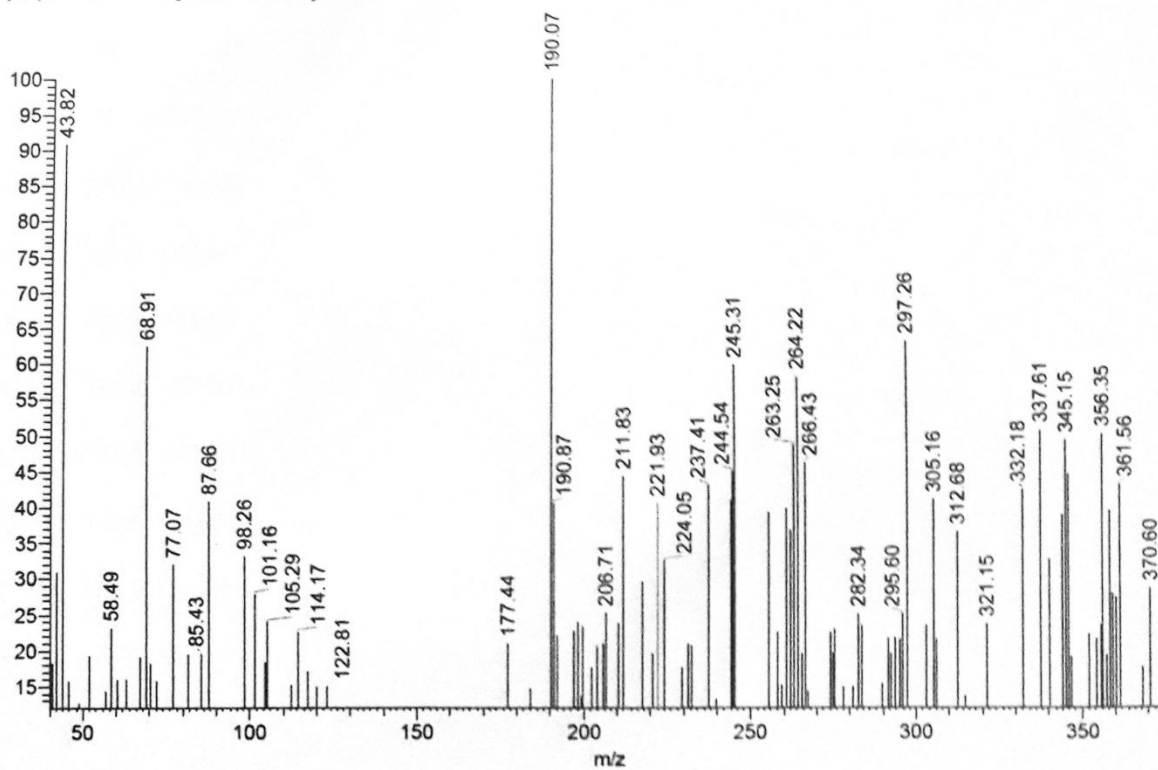

Supplement: molecules-24-01741-s001.pdf [file molecules-24-01741-s001.pdf]
